# Supplementary material
Source: Elsevier journal article supplement (https://www.sciencedirect.com/science/article/pii/S036631752100087X)
Supplement: mmc1 [file S036631752100087X:mmc1.doc]

**Appendix A. Supplementary data**

Supplementary Table . Sintered microstructural and electromagnetic wave absorption properties of the sintered Cu-doped Ni-Zn-polycrystalline ferrite: sintering temperature = 900°C

| **P (MPa)** | **T (°C)** | **t (min)** | **φ** | **G (µm)** | **Matching frequency (Hz)** | **Matching thickness (mm)** | **Bandwidth for**  **RL ≤ -20 dB (Hz)** | **Minimum RL**  **(dB)** |
| --- | --- | --- | --- | --- | --- | --- | --- | --- |
| 50 | 900 | 0 | 0.5442 | 0.88 | 2.53·109 | 1.0 | 1.58·108 | -36 |
| 75 | 900 | 0 | 0.5652 | 0.88 | 2.51·109 | 1.0 | 1.61·108 | -38 |
| 100 | 900 | 0 | 0.5795 | 0.88 | 2.51·109 | 1.0 | 1.61·108 | -39 |
| 150 | 900 | 0 | 0.5988 | 0.88 | 2.53·109 | 0.9 | 1.56·108 | -35 |
| 200 | 900 | 0 | 0.6119 | 0.88 | 2.53·109 | 0.9 | 1.58·108 | -44 |
| 300 | 900 | 0 | 0.6292 | 0.88 | 2.53·109 | 0.9 | 1.58·108 | -38 |
| 50 | 900 | 5 | 0.5509 | 0.88 | 2.51·109 | 1.1 | 1.67·108 | -44 |
| 75 | 900 | 5 | 0.5741 | 0.88 | 2.48·109 | 1.1 | 1.70·108 | -37 |
| 100 | 900 | 5 | 0.5882 | 0.89 | 2.53·109 | 1.0 | 1.66·108 | -35 |
| 150 | 900 | 5 | 0.6068 | 0.89 | 2.51·109 | 1.1 | 1.67·108 | -40 |
| 200 | 900 | 5 | 0.6212 | 0.88 | 2.51·109 | 1.1 | 1.68·108 | -46 |
| 300 | 900 | 5 | 0.6380 | 0.89 | 2.53·109 | 0.9 | 1.60·108 | -37 |
| 50 | 900 | 10 | 0.5560 | 0.89 | 2.51·109 | 1.1 | 1.67·108 | -36 |
| 75 | 900 | 10 | 0.5796 | 0.89 | 2.51·109 | 1.1 | 1.71·108 | -37 |
| 100 | 900 | 10 | 0.5925 | 0.90 | 2.48·109 | 1.1 | 1.72·108 | -40 |
| 150 | 900 | 10 | 0.6123 | 0.89 | 2.53·109 | 1.0 | 1.68·108 | -37 |
| 200 | 900 | 10 | 0.6253 | 0.89 | 2.53·109 | 1.0 | 1.69·108 | -39 |
| 300 | 900 | 10 | 0.6426 | 0.90 | 2.51·109 | 1.0 | 1.68·108 | -40 |
| 50 | 900 | 20 | 0.5605 | 0.89 | 2.48·109 | 1.2 | 1.76·108 | -39 |
| 75 | 900 | 20 | 0.5832 | 0.89 | 2.51·109 | 1.1 | 1.74·108 | -37 |
| 100 | 900 | 20 | 0.5982 | 0.91 | 1.15·109 | 8.0 | 3.18·108 | -28 |
| 150 | 900 | 20 | 0.6168 | 0.90 | 1.14·109 | 7.7 | 3.53·108 | -33 |
| 200 | 900 | 20 | 0.6299 | 0.90 | 1.15·109 | 7.5 | 3.56·108 | -34 |
| 300 | 900 | 20 | 0.6469 | 0.91 | 2.51·109 | 1.0 | 1.71·108 | -47 |
| 50 | 900 | 30 | 0.5670 | 0.89 | 1.15·109 | 8.4 | 2.73·108 | -25 |
| 75 | 900 | 30 | 0.5888 | 0.90 | 1.15·109 | 8.1 | 2.91·108 | -26 |
| 100 | 900 | 30 | 0.6035 | 0.93 | 1.16·109 | 7.8 | 3.30·108 | -29 |
| 150 | 900 | 30 | 0.6227 | 0.92 | 1.16·109 | 7.5 | 3.71·108 | -37 |
| 200 | 900 | 30 | 0.6345 | 0.90 | 1.15·109 | 7.4 | 3.77·108 | -52 |
| 300 | 900 | 30 | 0.6498 | 0.91 | 1.14·109 | 7.4 | 3.77·108 | -45 |
| 50 | 900 | 45 | 0.5685 | 0.90 | 1.14·109 | 8.5 | 2.72·108 | -25 |
| 75 | 900 | 45 | 0.5926 | 0.93 | 1.15·109 | 7.9 | 3.61·108 | -36 |
| 100 | 900 | 45 | 0.6062 | 0.96 | 1.11·109 | 7.9 | 3.67·108 | -38 |
| 150 | 900 | 45 | 0.6259 | 0.94 | 1.15·109 | 7.4 | 3.77·108 | -44 |
| 200 | 900 | 45 | 0.6393 | 0.91 | 9.49·108 | 8.7 | 3.76·108 | -64 |
| 300 | 900 | 45 | 0.6540 | 0.92 | 1.35·109 | 6.0 | 3.93·108 | -54 |
| 50 | 900 | 60 | 0.5721 | 0.89 | 1.15·109 | 8.2 | 3.36·108 | -31 |
| 75 | 900 | 60 | 0.5957 | 0.90 | 1.15·109 | 8.0 | 3.04·108 | -25 |
| 100 | 900 | 60 | 0.6082 | 0.99 | 1.13·109 | 7.8 | 3.77·108 | -42 |
| 150 | 900 | 60 | 0.6276 | 0.95 | 1.11·109 | 7.6 | 3.85·108 | -49 |
| 200 | 900 | 60 | 0.6417 | 0.93 | 8.94·108 | 9.1 | 3.71·108 | -61 |
| 300 | 900 | 60 | 0.6567 | 0.91 | 8.76·108 | 9.1 | 3.67·108 | -60 |
| 50 | 900 | 120 | 0.5779 | 0.90 | 1.14·109 | 7.8 | 3.83·108 | -66 |
| 75 | 900 | 120 | 0.6039 | 0.91 | 1.40·109 | 5.9 | 3.96·108 | -56 |
| 100 | 900 | 120 | 0.6177 | 1.01 | 1.55·109 | 5.1 | 4.10·108 | -50 |
| 150 | 900 | 120 | 0.6373 | 0.99 | 6.96·108 | 10.5 | 3.58·108 | -72 |
| 200 | 900 | 120 | 0.6501 | 0.95 | 6.69·108 | 6.9 | 3.57·108 | -61 |
| 300 | 900 | 120 | 0.6652 | 0.94 | 1.36·109 | 5.8 | 4.14·108 | -59 |
| 50 | 900 | 300 | 0.5904 | 0.90 | 6.89·108 | 10.9 | 3.65·108 | -56 |
| 75 | 900 | 300 | 0.6164 | 0.92 | 6.05·108 | 11.0 | 3.70·108 | -62 |
| 100 | 900 | 300 | 0.6316 | 1.10 | 1.78·109 | 4.0 | 3.45·108 | -53 |
| 150 | 900 | 300 | 0.6506 | 1.05 | 5.10·108 | 10.9 | 3.52·108 | -61 |
| 200 | 900 | 300 | 0.6631 | 0.99 | 5.26·108 | 10.5 | 3.70·108 | -63 |
| 300 | 900 | 300 | 0.6770 | 0.98 | 1.78·109 | 3.8 | 3.37·108 | -45 |
| 50 | 900 | 900 | 0.6204 | 0.91 | 2.01·109 | 3.0 | 2.94·108 | -44 |
| 75 | 900 | 900 | 0.6466 | 0.95 | 4.01·108 | 11.0 | 3.49·108 | -58 |
| 100 | 900 | 900 | 0.6609 | 1.21 | 3.82·108 | 10.6 | 3.45·108 | -75 |
| 150 | 900 | 900 | 0.6804 | 1.18 | 3.67·108 | 10.1 | 3.46·108 | -55 |
| 200 | 900 | 900 | 0.6916 | 1.09 | 3.59·108 | 9.9 | 3.37·108 | -59 |
| 300 | 900 | 900 | 0.7024 | 1.09 | 2.16·109 | 2.3 | 2.78·108 | -56 |
| 50 | 900 | 1800 | 0.6447 | 1.12 | 3.63·108 | 10.8 | 3.44·108 | -65 |
| 75 | 900 | 1800 | 0.6710 | 1.20 | 4.22·108 | 9.8 | 4.59·108 | -58 |
| 100 | 900 | 1800 | 0.6846 | 1.31 | 3.19·108 | 9.9 | 3.34·108 | -54 |
| 150 | 900 | 1800 | 0.7046 | 1.18 | 3.00·108 | 9.4 | 3.21·108 | -58 |
| 200 | 900 | 1800 | 0.7164 | 1.12 | 3.00·108 | 9.0 | 3.23·108 | -56 |
| 300 | 900 | 1800 | 0.7229 | 1.09 | 3.03·108 | 9.0 | 3.15·108 | -53 |

Supplementary Table . Sintered microstructural and electromagnetic wave absorption properties of the sintered Cu-doped Ni-Zn-polycrystalline ferrite: sintering temperature = 950°C

| **P (MPa)** | **T (°C)** | **t (min)** | **φ** | **G (µm)** | **Matching frequency (Hz)** | **Matching thickness (mm)** | **Bandwidth for**  **RL ≤ -20 dB (Hz)** | **Minimum RL**  **(dB)** |
| --- | --- | --- | --- | --- | --- | --- | --- | --- |
| 50 | 950 | 0 | 0.5653 | 0.88 | 2.48·109 | 1.2 | 1.76·108 | -44 |
| 75 | 950 | 0 | 0.5874 | 0.88 | 1.15·109 | 8.2 | 3.23·108 | -29 |
| 100 | 950 | 0 | 0.6018 | 0.89 | 1.13·109 | 8.2 | 3.50·108 | -34 |
| 150 | 950 | 0 | 0.6206 | 0.89 | 1.10·109 | 8.0 | 3.70·108 | -43 |
| 200 | 950 | 0 | 0.6337 | 0.89 | 1.15·109 | 7.5 | 3.68·108 | -46 |
| 300 | 950 | 0 | 0.6495 | 0.89 | 2.51·109 | 1.0 | 1.70·108 | -50 |
| 50 | 950 | 5 | 0.5757 | 0.89 | 1.17·109 | 7.9 | 3.46·108 | -31 |
| 75 | 950 | 5 | 0.6009 | 0.89 | 1.37·109 | 6.2 | 4.00·108 | -56 |
| 100 | 950 | 5 | 0.6145 | 0.90 | 8.50·108 | 9.7 | 3.62·108 | -67 |
| 150 | 950 | 5 | 0.6334 | 0.90 | 1.58·109 | 4.9 | 4.08·108 | -63 |
| 200 | 950 | 5 | 0.6469 | 0.90 | 7.46·108 | 10.0 | 3.53·108 | -62 |
| 300 | 950 | 5 | 0.6623 | 0.91 | 6.89·108 | 10.3 | 3.33·108 | -71 |
| 50 | 950 | 10 | 0.5850 | 0.90 | 1.10·109 | 8.1 | 3.79·108 | -69 |
| 75 | 950 | 10 | 0.6089 | 0.90 | 1.19·109 | 7.2 | 4.01·108 | -66 |
| 100 | 950 | 10 | 0.6225 | 0.92 | 7.24·108 | 10.5 | 3.55·108 | -57 |
| 150 | 950 | 10 | 0.6419 | 0.91 | 6.62·108 | 10.7 | 3.49·108 | -61 |
| 200 | 950 | 10 | 0.6550 | 0.91 | 6.30·108 | 10.7 | 3.41·108 | -59 |
| 300 | 950 | 10 | 0.6692 | 0.91 | 6.30·108 | 10.6 | 3.36·108 | -57 |
| 50 | 950 | 20 | 0.5951 | 0.91 | 2.51·109 | 1.3 | 2.04·108 | -46 |
| 75 | 950 | 20 | 0.6185 | 0.92 | 1.16·109 | 7.4 | 4.33·108 | -56 |
| 100 | 950 | 20 | 0.6320 | 0.94 | 1.53·109 | 5.1 | 4.03·108 | -55 |
| 150 | 950 | 20 | 0.6509 | 0.93 | 1.77·109 | 4.0 | 3.45·108 | -47 |
| 200 | 950 | 20 | 0.6632 | 0.92 | 5.53·108 | 10.7 | 3.48·108 | -68 |
| 300 | 950 | 20 | 0.6772 | 0.95 | 1.75·109 | 4.0 | 3.55·108 | -48 |
| 50 | 950 | 30 | 0.6014 | 0.92 | 8.17·108 | 9.9 | 4.00·108 | -65 |
| 75 | 950 | 30 | 0.6244 | 0.93 | 7.46·108 | 9.9 | 4.21·108 | -61 |
| 100 | 950 | 30 | 0.6394 | 0.95 | 5.26·108 | 11.2 | 3.46·108 | -60 |
| 150 | 950 | 30 | 0.6597 | 0.97 | 5.05·108 | 11.0 | 3.47·108 | -64 |
| 200 | 950 | 30 | 0.6715 | 0.97 | 5.81·108 | 10.1 | 4.02·108 | -60 |
| 300 | 950 | 30 | 0.6846 | 0.97 | 6.89·108 | 9.4 | 4.46·108 | -64 |
| 50 | 950 | 45 | 0.6071 | 0.93 | 1.57·109 | 5.1 | 4.00·108 | -57 |
| 75 | 950 | 45 | 0.6326 | 0.94 | 5.26·108 | 11.1 | 3.65·108 | -58 |
| 100 | 950 | 45 | 0.6465 | 0.97 | 1.80·109 | 3.9 | 3.41·108 | -50 |
| 150 | 950 | 45 | 0.6661 | 0.96 | 5.10·108 | 10.4 | 3.89·108 | -57 |
| 200 | 950 | 45 | 0.6792 | 0.95 | 4.26·108 | 10.8 | 3.24·108 | -58 |
| 300 | 950 | 45 | 0.6919 | 0.97 | 4.57·108 | 10.4 | 3.42·108 | -58 |
| 50 | 950 | 60 | 0.6102 | 0.98 | 1.97·109 | 3.2 | 2.97·108 | -59 |
| 75 | 950 | 60 | 0.6371 | 0.99 | 1.97·109 | 3.2 | 2.97·108 | -59 |
| 100 | 950 | 60 | 0.6512 | 0.99 | 2.07·109 | 2.7 | 2.86·108 | -55 |
| 150 | 950 | 60 | 0.6712 | 1.00 | 1.97·109 | 3.1 | 2.98·108 | -59 |
| 200 | 950 | 60 | 0.6840 | 1.11 | 2.03·109 | 2.8 | 2.93·108 | -55 |
| 300 | 950 | 60 | 0.6974 | 1.21 | 4.35·108 | 10.1 | 3.42·108 | -81 |
| 50 | 950 | 120 | 0.6346 | 1.11 | 4.18·108 | 11.1 | 3.44·108 | -66 |
| 75 | 950 | 120 | 0.6614 | 1.05 | 3.74·108 | 10.6 | 3.34·108 | -60 |
| 100 | 950 | 120 | 0.6758 | 1.02 | 3.59·108 | 10.3 | 3.27·108 | -58 |
| 150 | 950 | 120 | 0.6955 | 1.08 | 3.39·108 | 9.9 | 3.15·108 | -65 |
| 200 | 950 | 120 | 0.7076 | 1.35 | 3.35·108 | 9.5 | 3.17·108 | -60 |
| 300 | 950 | 120 | 0.7183 | 1.40 | 2.29·109 | 1.9 | 2.42·108 | -45 |
| 50 | 950 | 300 | 0.6747 | 1.22 | 3.39·108 | 10.0 | 3.35·108 | -54 |
| 75 | 950 | 300 | 0.7037 | 1.24 | 2.88·108 | 9.6 | 3.02·108 | -64 |
| 100 | 950 | 300 | 0.7180 | 1.33 | 2.72·108 | 9.3 | 2.91·108 | -53 |
| 150 | 950 | 300 | 0.7375 | 1.38 | 2.69·108 | 8.8 | 2.96·108 | -59 |
| 200 | 950 | 300 | 0.7490 | 1.40 | 2.64·108 | 8.5 | 2.87·108 | -52 |
| 300 | 950 | 300 | 0.7567 | 1.42 | 2.66·108 | 8.4 | 2.84·108 | -58 |
| 50 | 950 | 900 | 0.7332 | 1.40 | 2.56·108 | 9.0 | 3.08·108 | -55 |
| 75 | 950 | 900 | 0.7623 | 1.00 | 2.27·108 | 8.3 | 2.92·108 | -52 |
| 100 | 950 | 900 | 0.7771 | 1.84 | 2.07·108 | 8.0 | 2.70·108 | -61 |
| 150 | 950 | 900 | 0.7978 | 1.81 | 1.95·108 | 7.7 | 2.56·108 | -59 |
| 200 | 950 | 900 | 0.8088 | 1.81 | 1.97·108 | 7.5 | 2.60·108 | -67 |
| 300 | 950 | 900 | 0.8149 | 1.85 | 2.03·108 | 7.5 | 2.60·108 | -60 |
| 50 | 950 | 1800 | 0.7661 | 1.74 | 2.25·108 | 8.3 | 2.98·108 | -54 |
| 75 | 950 | 1800 | 0.7974 | 1.89 | 1.91·108 | 7.8 | 2.73·108 | -63 |
| 100 | 950 | 1800 | 0.8108 | 2.01 | 1.86·108 | 7.6 | 2.72·108 | -57 |
| 150 | 950 | 1800 | 0.8319 | 2.05 | 1.89·108 | 7.2 | 2.88·108 | -54 |
| 200 | 950 | 1800 | 0.8457 | 2.12 | 1.73·108 | 7.1 | 2.61·108 | -55 |
| 300 | 950 | 1800 | 0.8523 | 2.15 | 1.78·108 | 7.0 | 2.63·108 | -56 |

Supplementary Table . Sintered microstructural and electromagnetic wave absorption properties of the sintered Cu-doped Ni-Zn-polycrystalline ferrite: sintering temperature = 975°C

| **P (MPa)** | **T (°C)** | **t (min)** | **φ** | **G (µm)** | **Matching frequency (Hz)** | **Matching thickness (mm)** | **Bandwidth for**  **RL ≤ -20 dB (Hz)** | **Minimum RL**  **(dB)** |
| --- | --- | --- | --- | --- | --- | --- | --- | --- |
| 50 | 975 | 0 | 0.5871 | 0.95 | 1.15·109 | 8.1 | 3.79·108 | -48 |
| 75 | 975 | 0 | 0.6093 | 0.91 | 8.01·108 | 10.6 | 3.44·108 | -64 |
| 100 | 975 | 0 | 0.6236 | 0.88 | 7.85·108 | 10.4 | 3.49·108 | -66 |
| 150 | 975 | 0 | 0.6414 | 0.95 | 6.89·108 | 11.0 | 3.28·108 | -67 |
| 200 | 975 | 0 | 0.6539 | 1.01 | 6.89·108 | 11.0 | 3.31·108 | -67 |
| 300 | 975 | 0 | 0.6674 | 1.02 | 6.62·108 | 11.0 | 3.15·108 | -63 |
| 50 | 975 | 5 | 0.6044 | 0.93 | 7.17·108 | 11.1 | 3.60·108 | -58 |
| 75 | 975 | 5 | 0.6281 | 0.90 | 6.05·108 | 11.4 | 3.32·108 | -60 |
| 100 | 975 | 5 | 0.6408 | 0.88 | 5.58·108 | 11.5 | 3.12·108 | -59 |
| 150 | 975 | 5 | 0.6589 | 0.91 | 1.78·109 | 4.0 | 3.43·108 | -48 |
| 200 | 975 | 5 | 0.6707 | 0.96 | 1.77·109 | 4.1 | 3.47·108 | -52 |
| 300 | 975 | 5 | 0.6848 | 0.95 | 5.15·108 | 11.3 | 2.82·108 | -55 |
| 50 | 975 | 10 | 0.6149 | 0.99 | 5.64·108 | 11.9 | 3.15·108 | -57 |
| 75 | 975 | 10 | 0.6374 | 0.98 | 1.80·109 | 4.1 | 3.40·108 | -55 |
| 100 | 975 | 10 | 0.6511 | 0.96 | 1.82·109 | 4.0 | 3.35·108 | -53 |
| 150 | 975 | 10 | 0.6677 | 0.95 | 4.71·108 | 11.2 | 2.80·108 | -59 |
| 200 | 975 | 10 | 0.6788 | 0.95 | 4.71·108 | 11.0 | 2.80·108 | -56 |
| 300 | 975 | 10 | 0.6899 | 0.96 | 4.71·108 | 11.0 | 2.67·108 | -56 |
| 50 | 975 | 20 | 0.6298 | 1.01 | 4.85·108 | 11.8 | 2.95·108 | -59 |
| 75 | 975 | 20 | 0.6499 | 0.99 | 2.31·109 | 1.9 | 2.36·108 | -50 |
| 100 | 975 | 20 | 0.6649 | 0.98 | 4.48·108 | 11.1 | 2.83·108 | -60 |
| 150 | 975 | 20 | 0.6828 | 1.01 | 4.26·108 | 10.8 | 2.65·108 | -57 |
| 200 | 975 | 20 | 0.6932 | 1.02 | 1.97·109 | 3.1 | 2.99·108 | -55 |
| 300 | 975 | 20 | 0.7044 | 1.01 | 1.91·109 | 3.3 | 2.99·108 | -51 |
| 50 | 975 | 30 | 0.6390 | 1.04 | 4.57·108 | 11.1 | 3.56·108 | -63 |
| 75 | 975 | 30 | 0.6650 | 0.99 | 4.18·108 | 10.9 | 2.66·108 | -59 |
| 100 | 975 | 30 | 0.6768 | 0.95 | 2.22·109 | 2.2 | 2.63·108 | -39 |
| 150 | 975 | 30 | 0.6954 | 0.99 | 2.24·109 | 2.1 | 2.58·108 | -44 |
| 200 | 975 | 30 | 0.7069 | 1.01 | 2.24·109 | 2.1 | 2.56·108 | -53 |
| 300 | 975 | 30 | 0.7161 | 1.01 | 4.01·108 | 10.2 | 2.42·108 | -55 |
| 50 | 975 | 45 | 0.6513 | 1.08 | 4.18·108 | 11.0 | 2.68·108 | -68 |
| 75 | 975 | 45 | 0.6771 | 1.06 | 4.39·108 | 10.1 | 3.24·108 | -58 |
| 100 | 975 | 45 | 0.6914 | 1.04 | 3.86·108 | 10.1 | 2.56·108 | -58 |
| 150 | 975 | 45 | 0.7089 | 1.05 | 3.70·108 | 9.9 | 2.42·108 | -54 |
| 200 | 975 | 45 | 0.7206 | 1.09 | 3.59·108 | 9.7 | 2.32·108 | -52 |
| 300 | 975 | 45 | 0.7276 | 1.09 | 3.82·108 | 9.9 | 2.42·108 | -55 |
| 50 | 975 | 60 | 0.6630 | 1.11 | 4.44·108 | 10.4 | 3.22·108 | -56 |
| 75 | 975 | 60 | 0.6883 | 1.12 | 3.70·108 | 10.1 | 2.45·108 | -54 |
| 100 | 975 | 60 | 0.7029 | 1.13 | 3.93·108 | 9.6 | 2.90·108 | -54 |
| 150 | 975 | 60 | 0.7205 | 1.11 | 3.52·108 | 9.5 | 2.38·108 | -52 |
| 200 | 975 | 60 | 0.7329 | 1.10 | 3.52·108 | 9.3 | 2.36·108 | -56 |
| 300 | 975 | 60 | 0.7405 | 1.10 | 2.29·109 | 1.9 | 2.37·108 | -35 |
| 50 | 975 | 120 | 0.6994 | 1.34 | 3.56·108 | 9.7 | 2.53·108 | -56 |
| 75 | 975 | 120 | 0.7256 | 1.30 | 3.89·108 | 8.9 | 3.42·108 | -65 |
| 100 | 975 | 120 | 0.7381 | 1.29 | 3.16·108 | 9.0 | 2.29·108 | -61 |
| 150 | 975 | 120 | 0.7578 | 1.28 | 3.06·108 | 8.7 | 2.21·108 | -57 |
| 200 | 975 | 120 | 0.7664 | 1.27 | 3.12·108 | 8.4 | 2.27·108 | -62 |
| 300 | 975 | 120 | 0.7722 | 1.28 | 3.09·108 | 8.4 | 2.20·108 | -51 |
| 50 | 975 | 300 | 0.7527 | 1.62 | 2.94·108 | 8.8 | 2.26·108 | -57 |
| 75 | 975 | 300 | 0.7782 | 1.59 | 2.91·108 | 8.3 | 2.33·108 | -65 |
| 100 | 975 | 300 | 0.7875 | 1.58 | 2.72·108 | 8.1 | 2.16·108 | -62 |
| 150 | 975 | 300 | 0.8075 | 1.51 | 2.74·108 | 7.8 | 2.21·108 | -59 |
| 200 | 975 | 300 | 0.8141 | 1.46 | 2.83·108 | 7.7 | 2.28·108 | -53 |
| 300 | 975 | 300 | 0.8167 | 1.45 | 2.74·108 | 7.6 | 2.14·108 | -59 |
| 50 | 975 | 900 | 0.8217 | 1.95 | 2.53·108 | 7.8 | 2.19·108 | -56 |
| 75 | 975 | 900 | 0.8418 | 2.00 | 2.43·108 | 7.4 | 2.21·108 | -63 |
| 100 | 975 | 900 | 0.8568 | 2.15 | 2.51·108 | 7.2 | 2.37·108 | -50 |
| 150 | 975 | 900 | 0.8757 | 2.14 | 2.41·108 | 6.9 | 2.27·108 | -57 |
| 200 | 975 | 900 | 0.8819 | 2.14 | 2.25·108 | 6.8 | 2.09·108 | -69 |
| 300 | 975 | 900 | 0.8882 | 2.15 | 2.41·108 | 6.7 | 2.27·108 | -67 |
| 50 | 975 | 1800 | 0.8509 | 2.41 | 2.41·108 | 7.5 | 2.21·108 | -56 |
| 75 | 975 | 1800 | 0.8761 | 2.54 | 2.69·108 | 7.0 | 2.67·108 | -51 |
| 100 | 975 | 1800 | 0.8893 | 2.60 | 2.22·108 | 7.0 | 2.14·108 | -55 |
| 150 | 975 | 1800 | 0.9068 | 2.56 | 2.22·108 | 6.8 | 2.14·108 | -69 |
| 200 | 975 | 1800 | 0.9146 | 2.47 | 2.16·108 | 6.7 | 2.09·108 | -51 |
| 300 | 975 | 1800 | 0.9181 | 2.48 | 2.25·108 | 6.6 | 2.16·108 | -57 |

Supplementary Table . Sintered microstructural and electromagnetic wave absorption properties of the sintered Cu-doped Ni-Zn-polycrystalline ferrite: sintering temperature = 1000°C

| **P (MPa)** | **T (°C)** | **t (min)** | **φ** | **G (µm)** | **Matching frequency (Hz)** | **Matching thickness (mm)** | **Bandwidth for**  **RL ≤ -20 dB (Hz)** | **Minimum RL**  **(dB)** |
| --- | --- | --- | --- | --- | --- | --- | --- | --- |
| 50 | 1000 | 0 | 0.5925 | 1.12 | 6.89·108 | 11.5 | 3.44·108 | -55 |
| 75 | 1000 | 0 | 0.6153 | 1.11 | 6.42·108 | 11.3 | 3.51·108 | -64 |
| 100 | 1000 | 0 | 0.6297 | 1.10 | 5.87·108 | 11.4 | 3.35·108 | -56 |
| 150 | 1000 | 0 | 0.6508 | 1.18 | 6.30·108 | 10.7 | 3.71·108 | -63 |
| 200 | 1000 | 0 | 0.6633 | 1.21 | 1.78·109 | 4.0 | 3.42·108 | -58 |
| 300 | 1000 | 0 | 0.6765 | 1.20 | 5.42·108 | 11.1 | 3.10·108 | -57 |
| 50 | 1000 | 5 | 0.6142 | 1.08 | 1.86·109 | 3.9 | 3.23·108 | -47 |
| 75 | 1000 | 5 | 0.6397 | 1.07 | 2.31·109 | 1.9 | 2.34·108 | -46 |
| 100 | 1000 | 5 | 0.6536 | 1.07 | 1.93·109 | 3.4 | 2.99·108 | -56 |
| 150 | 1000 | 5 | 0.6730 | 1.10 | 4.18·108 | 11.1 | 2.86·108 | -69 |
| 200 | 1000 | 5 | 0.6848 | 1.14 | 2.09·109 | 2.6 | 2.84·108 | -55 |
| 300 | 1000 | 5 | 0.6963 | 1.13 | 4.35·108 | 10.5 | 2.92·108 | -56 |
| 50 | 1000 | 10 | 0.6299 | 1.10 | 4.48·108 | 11.8 | 3.01·108 | -63 |
| 75 | 1000 | 10 | 0.6548 | 1.08 | 4.09·108 | 11.2 | 2.96·108 | -59 |
| 100 | 1000 | 10 | 0.6694 | 1.03 | 3.93·108 | 10.9 | 2.90·108 | -57 |
| 150 | 1000 | 10 | 0.6890 | 1.07 | 2.22·109 | 2.2 | 2.63·108 | -38 |
| 200 | 1000 | 10 | 0.7009 | 1.10 | 2.34·109 | 1.8 | 2.33·108 | -57 |
| 300 | 1000 | 10 | 0.7103 | 1.11 | 3.86·108 | 10.2 | 2.77·108 | -59 |
| 50 | 1000 | 20 | 0.6490 | 1.15 | 3.89·108 | 11.1 | 2.86·108 | -58 |
| 75 | 1000 | 20 | 0.6764 | 1.15 | 3.59·108 | 10.5 | 2.81·108 | -60 |
| 100 | 1000 | 20 | 0.6905 | 1.15 | 3.42·108 | 10.1 | 2.70·108 | -60 |
| 150 | 1000 | 20 | 0.7107 | 1.16 | 3.35·108 | 9.7 | 2.71·108 | -59 |
| 200 | 1000 | 20 | 0.7223 | 1.18 | 3.25·108 | 9.5 | 2.60·108 | -63 |
| 300 | 1000 | 20 | 0.7292 | 1.19 | 2.31·109 | 1.9 | 2.38·108 | -38 |
| 50 | 1000 | 30 | 0.6675 | 1.24 | 3.56·108 | 10.7 | 2.73·108 | -71 |
| 75 | 1000 | 30 | 0.6938 | 1.25 | 3.35·108 | 10.1 | 2.77·108 | -58 |
| 100 | 1000 | 30 | 0.7091 | 1.26 | 3.39·108 | 9.6 | 2.88·108 | -56 |
| 150 | 1000 | 30 | 0.7297 | 1.23 | 3.03·108 | 9.4 | 2.55·108 | -61 |
| 200 | 1000 | 30 | 0.7400 | 1.22 | 3.16·108 | 9.0 | 2.71·108 | -62 |
| 300 | 1000 | 30 | 0.7463 | 1.23 | 3.22·108 | 9.2 | 2.63·108 | -56 |
| 50 | 1000 | 45 | 0.6876 | 1.38 | 3.25·108 | 10.1 | 2.69·108 | -63 |
| 75 | 1000 | 45 | 0.7145 | 1.37 | 3.12·108 | 9.6 | 2.71·108 | -56 |
| 100 | 1000 | 45 | 0.7297 | 1.37 | 2.91·108 | 9.2 | 2.59·108 | -55 |
| 150 | 1000 | 45 | 0.7486 | 1.37 | 2.83·108 | 8.9 | 2.57·108 | -79 |
| 200 | 1000 | 45 | 0.7594 | 1.38 | 2.80·108 | 8.7 | 2.52·108 | -63 |
| 300 | 1000 | 45 | 0.7659 | 1.38 | 2.83·108 | 8.6 | 2.44·108 | -59 |
| 50 | 1000 | 60 | 0.7020 | 1.39 | 2.86·108 | 9.8 | 2.46·108 | -57 |
| 75 | 1000 | 60 | 0.7305 | 1.40 | 2.80·108 | 9.2 | 2.57·108 | -66 |
| 100 | 1000 | 60 | 0.7454 | 1.41 | 3.00·108 | 8.7 | 2.89·108 | -54 |
| 150 | 1000 | 60 | 0.7646 | 1.45 | 2.61·108 | 8.6 | 2.50·108 | -56 |
| 200 | 1000 | 60 | 0.7763 | 1.50 | 2.56·108 | 8.4 | 2.40·108 | -52 |
| 300 | 1000 | 60 | 0.7821 | 1.51 | 2.56·108 | 8.4 | 2.40·108 | -52 |
| 50 | 1000 | 120 | 0.7451 | 1.59 | 2.64·108 | 9.1 | 2.57·108 | -54 |
| 75 | 1000 | 120 | 0.7759 | 1.59 | 2.41·108 | 8.3 | 2.55·108 | -55 |
| 100 | 1000 | 120 | 0.7897 | 1.59 | 2.27·108 | 7.8 | 2.60·108 | -61 |
| 150 | 1000 | 120 | 0.8093 | 1.59 | 2.27·108 | 7.8 | 2.49·108 | -61 |
| 200 | 1000 | 120 | 0.8214 | 1.60 | 2.16·108 | 7.7 | 2.34·108 | -53 |
| 300 | 1000 | 120 | 0.8282 | 1.60 | 2.22·108 | 7.6 | 2.34·108 | -56 |
| 50 | 1000 | 300 | 0.8067 | 2.18 | 2.46·108 | 8.0 | 2.82·108 | -52 |
| 75 | 1000 | 300 | 0.8360 | 2.18 | 2.03·108 | 7.6 | 2.50·108 | -55 |
| 100 | 1000 | 300 | 0.8510 | 2.19 | 1.97·108 | 7.5 | 2.49·108 | -68 |
| 150 | 1000 | 300 | 0.8706 | 2.19 | 1.86·108 | 7.2 | 2.38·108 | -57 |
| 200 | 1000 | 300 | 0.8814 | 2.18 | 1.91·108 | 7.0 | 2.58·108 | -52 |
| 300 | 1000 | 300 | 0.8882 | 2.19 | 1.91·108 | 6.9 | 2.45·108 | -63 |
| 50 | 1000 | 900 | 0.8751 | 3.61 | 1.78·108 | 7.5 | 2.46·108 | -52 |
| 75 | 1000 | 900 | 0.8993 | 3.80 | 1.71·108 | 7.1 | 2.54·108 | -68 |
| 100 | 1000 | 900 | 0.9107 | 4.07 | 1.80·108 | 6.9 | 2.73·108 | -68 |
| 150 | 1000 | 900 | 0.9271 | 4.05 | 1.65·108 | 6.8 | 2.52·108 | -75 |
| 200 | 1000 | 900 | 0.9361 | 4.02 | 1.55·108 | 6.8 | 2.41·108 | -53 |
| 300 | 1000 | 900 | 0.9420 | 4.05 | 1.58·108 | 6.7 | 2.41·108 | -51 |
| 50 | 1000 | 1800 | 0.8974 | 4.29 | 2.01·108 | 7.3 | 2.88·108 | -60 |
| 75 | 1000 | 1800 | 0.9197 | 4.27 | 1.54·108 | 7.2 | 2.41·108 | -51 |
| 100 | 1000 | 1800 | 0.9302 | 4.26 | 1.55·108 | 7.0 | 2.50·108 | -54 |
| 150 | 1000 | 1800 | 0.9425 | 4.98 | 1.63·108 | 6.7 | 2.67·108 | -51 |
| 200 | 1000 | 1800 | 0.9503 | 6.56 | 1.57·108 | 6.7 | 2.64·108 | -54 |
| 300 | 1000 | 1800 | 0.9551 | 5.99 | 1.46·108 | 7.0 | 2.43·108 | -71 |

Supplementary Table . Sintered microstructural and electromagnetic wave absorption properties of the sintered Cu-doped Ni-Zn-polycrystalline ferrite: sintering temperature = 1025°C

| **P (MPa)** | **T (°C)** | **t (min)** | **φ** | **G (µm)** | **Matching frequency (Hz)** | **Matching thickness (mm)** | **Bandwidth for**  **RL ≤ -20 dB (Hz)** | **Minimum RL**  **(dB)** |
| --- | --- | --- | --- | --- | --- | --- | --- | --- |
| 50 | 1025 | 0 | 0.6257 | 1.29 | 1.82·109 | 4.0 | 3.37·108 | -52 |
| 75 | 1025 | 0 | 0.6506 | 1.30 | 4.53·108 | 11.2 | 3.39·108 | -66 |
| 100 | 1025 | 0 | 0.6625 | 1.32 | 4.39·108 | 11.0 | 3.33·108 | -56 |
| 150 | 1025 | 0 | 0.6833 | 1.33 | 1.97·109 | 3.1 | 2.95·108 | -47 |
| 200 | 1025 | 0 | 0.6947 | 1.35 | 1.89·109 | 3.4 | 3.02·108 | -51 |
| 300 | 1025 | 0 | 0.7050 | 1.36 | 4.35·108 | 10.4 | 3.19·108 | -60 |
| 50 | 1025 | 5 | 0.6615 | 1.37 | 4.26·108 | 10.4 | 3.70·108 | -55 |
| 75 | 1025 | 5 | 0.6868 | 1.37 | 3.45·108 | 10.3 | 3.13·108 | -60 |
| 100 | 1025 | 5 | 0.6991 | 1.37 | 3.42·108 | 9.8 | 3.18·108 | -55 |
| 150 | 1025 | 5 | 0.7189 | 1.35 | 3.49·108 | 9.5 | 3.31·108 | -53 |
| 200 | 1025 | 5 | 0.7274 | 1.31 | 2.31·109 | 1.9 | 2.42·108 | -44 |
| 300 | 1025 | 5 | 0.7338 | 1.33 | 2.36·109 | 1.7 | 2.24·108 | -58 |
| 50 | 1025 | 10 | 0.6807 | 1.32 | 3.49·108 | 10.1 | 3.30·108 | -61 |
| 75 | 1025 | 10 | 0.7081 | 1.37 | 3.16·108 | 9.5 | 3.13·108 | -54 |
| 100 | 1025 | 10 | 0.7233 | 1.46 | 2.97·108 | 9.3 | 2.92·108 | -52 |
| 150 | 1025 | 10 | 0.7417 | 1.42 | 2.91·108 | 9.1 | 2.91·108 | -53 |
| 200 | 1025 | 10 | 0.7489 | 1.39 | 2.88·108 | 8.9 | 2.83·108 | -56 |
| 300 | 1025 | 10 | 0.7560 | 1.38 | 2.97·108 | 9.0 | 2.80·108 | -65 |
| 50 | 1025 | 20 | 0.7117 | 1.42 | 2.86·108 | 9.5 | 2.90·108 | -56 |
| 75 | 1025 | 20 | 0.7423 | 1.43 | 2.56·108 | 8.8 | 2.79·108 | -54 |
| 100 | 1025 | 20 | 0.7578 | 1.44 | 2.51·108 | 8.5 | 2.75·108 | -62 |
| 150 | 1025 | 20 | 0.7720 | 1.47 | 2.41·108 | 8.2 | 2.67·108 | -62 |
| 200 | 1025 | 20 | 0.7845 | 1.49 | 1.91·108 | 7.1 | 2.60·108 | -52 |
| 300 | 1025 | 20 | 0.7893 | 1.50 | 2.86·108 | 8.0 | 3.24·108 | -61 |
| 50 | 1025 | 30 | 0.7329 | 1.52 | 2.61·108 | 9.0 | 2.82·108 | -53 |
| 75 | 1025 | 30 | 0.7613 | 1.57 | 2.34·108 | 8.5 | 2.72·108 | -52 |
| 100 | 1025 | 30 | 0.7766 | 1.61 | 2.22·108 | 8.2 | 2.59·108 | -56 |
| 150 | 1025 | 30 | 0.7940 | 1.57 | 2.20·108 | 7.9 | 2.60·108 | -55 |
| 200 | 1025 | 30 | 0.8040 | 1.50 | 2.34·108 | 7.7 | 2.77·108 | -62 |
| 300 | 1025 | 30 | 0.8104 | 1.51 | 2.22·108 | 7.7 | 2.54·108 | -57 |
| 50 | 1025 | 45 | 0.7615 | 1.69 | 2.29·108 | 8.6 | 2.71·108 | -60 |
| 75 | 1025 | 45 | 0.7895 | 1.67 | 2.36·108 | 7.9 | 3.10·108 | -57 |
| 100 | 1025 | 45 | 0.8044 | 1.62 | 2.01·108 | 7.8 | 2.56·108 | -51 |
| 150 | 1025 | 45 | 0.8228 | 1.63 | 1.99·108 | 7.4 | 2.54·108 | -54 |
| 200 | 1025 | 45 | 0.8303 | 1.64 | 2.01·108 | 7.3 | 2.54·108 | -52 |
| 300 | 1025 | 45 | 0.8320 | 1.63 | 2.07·108 | 7.2 | 2.54·108 | -51 |
| 50 | 1025 | 60 | 0.7804 | 1.81 | 2.25·108 | 8.4 | 2.81·108 | -63 |
| 75 | 1025 | 60 | 0.8116 | 1.90 | 1.93·108 | 7.8 | 2.58·108 | -63 |
| 100 | 1025 | 60 | 0.8252 | 1.98 | 1.93·108 | 7.5 | 2.58·108 | -51 |
| 150 | 1025 | 60 | 0.8421 | 1.95 | 1.88·108 | 7.3 | 2.52·108 | -55 |
| 200 | 1025 | 60 | 0.8523 | 1.90 | 1.88·108 | 7.2 | 2.52·108 | -60 |
| 300 | 1025 | 60 | 0.8570 | 1.90 | 1.91·108 | 7.1 | 2.47·108 | -62 |
| 50 | 1025 | 120 | 0.8312 | 2.66 | 1.80·108 | 7.8 | 2.64·108 | -52 |
| 75 | 1025 | 120 | 0.8553 | 2.65 | 1.80·108 | 7.2 | 2.82·108 | -53 |
| 100 | 1025 | 120 | 0.8697 | 2.64 | 1.60·108 | 7.1 | 2.51·108 | -51 |
| 150 | 1025 | 120 | 0.8863 | 2.74 | 1.57·108 | 6.8 | 2.48·108 | -64 |
| 200 | 1025 | 120 | 0.8962 | 2.81 | 1.55·108 | 6.7 | 2.43·108 | -54 |
| 300 | 1025 | 120 | 0.9015 | 2.80 | 1.61·108 | 6.7 | 2.48·108 | -66 |
| 50 | 1025 | 300 | 0.8825 | 3.55 | 1.51·108 | 7.1 | 2.58·108 | -51 |
| 75 | 1025 | 300 | 0.9040 | 3.78 | 1.38·108 | 6.8 | 2.52·108 | -52 |
| 100 | 1025 | 300 | 0.9141 | 4.41 | 1.38·108 | 6.6 | 2.53·108 | -57 |
| 150 | 1025 | 300 | 0.9288 | 4.39 | 1.33·108 | 6.5 | 2.44·108 | -56 |
| 200 | 1025 | 300 | 0.9362 | 4.33 | 1.33·108 | 6.5 | 2.45·108 | -78 |
| 300 | 1025 | 300 | 0.9412 | 4.30 | 1.30·108 | 6.7 | 2.34·108 | -51 |
| 50 | 1025 | 900 | 0.9134 | 5.61 | 1.27·108 | 7.0 | 2.51·108 | -58 |
| 75 | 1025 | 900 | 0.9321 | 7.00 | 1.23·108 | 6.7 | 2.53·108 | -69 |
| 100 | 1025 | 900 | 0.9417 | 8.98 | 1.16·108 | 6.6 | 2.38·108 | -53 |
| 150 | 1025 | 900 | 0.9498 | 9.13 | 1.20·108 | 6.5 | 2.44·108 | -58 |
| 200 | 1025 | 900 | 0.9561 | 10.17 | 1.13·108 | 6.8 | 2.34·108 | -62 |
| 300 | 1025 | 900 | 0.9602 | 10.86 | 1.10·108 | 7.0 | 2.29·108 | -61 |
| 50 | 1025 | 1800 | 0.9234 | 8.25 | 1.31·108 | 6.6 | 2.87·108 | -51 |
| 75 | 1025 | 1800 | 0.9388 | 9.56 | 1.21·108 | 6.6 | 2.68·108 | -65 |
| 100 | 1025 | 1800 | 0.9458 | 11.80 | 1.10·108 | 6.5 | 2.39·108 | -64 |
| 150 | 1025 | 1800 | 0.9548 | 11.85 | 1.09·108 | 6.6 | 2.39·108 | -56 |
| 200 | 1025 | 1800 | 0.9583 | 11.90 | 1.05·108 | 6.8 | 2.32·108 | -59 |
| 300 | 1025 | 1800 | 0.9629 | 12.08 | 1.13·108 | 6.8 | 2.48·108 | -57 |

Supplementary Table . Sintered microstructural and electromagnetic wave absorption properties of the sintered Cu-doped Ni-Zn-polycrystalline ferrite: sintering temperature = 1050°C

| **P (MPa)** | **T (°C)** | **t (min)** | **φ** | **G (µm)** | **Matching frequency (Hz)** | **Matching thickness (mm)** | **Bandwidth for**  **RL ≤ -20 dB (Hz)** | **Minimum RL**  **(dB)** |
| --- | --- | --- | --- | --- | --- | --- | --- | --- |
| 50 | 1050 | 0 | 0.6561 | 1.10 | 4.09·108 | 10.6 | 3.50·108 | -59 |
| 75 | 1050 | 0 | 0.6826 | 1.16 | 3.59·108 | 10.1 | 3.26·108 | -63 |
| 100 | 1050 | 0 | 0.6961 | 1.10 | 3.56·108 | 9.8 | 3.35·108 | -63 |
| 150 | 1050 | 0 | 0.7147 | 1.14 | 3.39·108 | 9.4 | 3.24·108 | -56 |
| 200 | 1050 | 0 | 0.7264 | 1.16 | 3.32·108 | 9.2 | 3.16·108 | -56 |
| 300 | 1050 | 0 | 0.7351 | 1.19 | 3.39·108 | 9.2 | 3.06·108 | -60 |
| 50 | 1050 | 5 | 0.7001 | 1.27 | 2.09·108 | 10.8 | 1.20·108 | -54 |
| 75 | 1050 | 5 | 0.7296 | 1.38 | 2.07·108 | 9.9 | 1.27·108 | -54 |
| 100 | 1050 | 5 | 0.7431 | 1.33 | 2.12·108 | 9.5 | 1.35·108 | -54 |
| 150 | 1050 | 5 | 0.7629 | 1.26 | 2.05·108 | 9.2 | 1.31·108 | -56 |
| 200 | 1050 | 5 | 0.7732 | 1.22 | 2.03·108 | 8.9 | 1.29·108 | -74 |
| 300 | 1050 | 5 | 0.7784 | 1.21 | 2.09·108 | 8.9 | 1.29·108 | -58 |
| 50 | 1050 | 10 | 0.7318 | 1.38 | 2.80·108 | 8.9 | 3.04·108 | -62 |
| 75 | 1050 | 10 | 0.7615 | 1.44 | 2.31·108 | 8.4 | 2.61·108 | -63 |
| 100 | 1050 | 10 | 0.7771 | 1.43 | 2.34·108 | 8.0 | 2.76·108 | -57 |
| 150 | 1050 | 10 | 0.7966 | 1.42 | 2.27·108 | 7.7 | 2.68·108 | -53 |
| 200 | 1050 | 10 | 0.8069 | 1.50 | 2.25·108 | 7.6 | 2.66·108 | -58 |
| 300 | 1050 | 10 | 0.8120 | 1.26 | 2.27·108 | 7.5 | 2.55·108 | -59 |
| 50 | 1050 | 20 | 0.7658 | 1.70 | 2.38·108 | 8.5 | 2.75·108 | -60 |
| 75 | 1050 | 20 | 0.7960 | 2.03 | 2.03·108 | 7.9 | 2.64·108 | -54 |
| 100 | 1050 | 20 | 0.8100 | 1.95 | 2.07·108 | 7.5 | 2.81·108 | -51 |
| 150 | 1050 | 20 | 0.8309 | 1.88 | 1.95·108 | 7.2 | 2.60·108 | -50 |
| 200 | 1050 | 20 | 0.8414 | 1.90 | 1.91·108 | 7.1 | 2.60·108 | -52 |
| 300 | 1050 | 20 | 0.8439 | 1.82 | 1.93·108 | 7.1 | 2.47·108 | -54 |
| 50 | 1050 | 30 | 0.7970 | 2.35 | 2.16·108 | 7.9 | 2.93·108 | -67 |
| 75 | 1050 | 30 | 0.8254 | 2.08 | 1.91·108 | 7.4 | 2.74·108 | -51 |
| 100 | 1050 | 30 | 0.8391 | 2.26 | 1.86·108 | 7.2 | 2.73·108 | -51 |
| 150 | 1050 | 30 | 0.8584 | 2.19 | 1.73·108 | 7.0 | 2.52·108 | -55 |
| 200 | 1050 | 30 | 0.8690 | 2.41 | 1.27·108 | 7.0 | 1.52·108 | -60 |
| 300 | 1050 | 30 | 0.8712 | 1.94 | 1.84·108 | 6.6 | 2.63·108 | -60 |
| 50 | 1050 | 45 | 0.8230 | 2.74 | 1.88·108 | 7.7 | 2.63·108 | -52 |
| 75 | 1050 | 45 | 0.8512 | 2.69 | 1.68·108 | 7.2 | 2.58·108 | -52 |
| 100 | 1050 | 45 | 0.8641 | 2.80 | 1.70·108 | 7.0 | 2.62·108 | -51 |
| 150 | 1050 | 45 | 0.8822 | 2.71 | 1.57·108 | 6.8 | 2.48·108 | -60 |
| 200 | 1050 | 45 | 0.8924 | 2.88 | 1.60·108 | 6.6 | 2.56·108 | -61 |
| 300 | 1050 | 45 | 0.8964 | 2.80 | 1.57·108 | 6.6 | 2.40·108 | -50 |
| 50 | 1050 | 60 | 0.8395 | 3.06 | 1.80·108 | 7.6 | 2.74·108 | -59 |
| 75 | 1050 | 60 | 0.8702 | 3.45 | 1.60·108 | 7.1 | 2.60·108 | -55 |
| 100 | 1050 | 60 | 0.8825 | 3.38 | 1.52·108 | 6.9 | 2.50·108 | -52 |
| 150 | 1050 | 60 | 0.9002 | 3.52 | 1.48·108 | 6.7 | 2.45·108 | -64 |
| 200 | 1050 | 60 | 0.9096 | 3.22 | 1.60·108 | 6.4 | 2.74·108 | -50 |
| 300 | 1050 | 60 | 0.9135 | 3.36 | 1.49·108 | 6.5 | 2.41·108 | -50 |
| 50 | 1050 | 120 | 0.8732 | 4.37 | 1.60·108 | 7.2 | 2.65·108 | -53 |
| 75 | 1050 | 120 | 0.8965 | 4.54 | 1.54·108 | 6.8 | 2.75·108 | -51 |
| 100 | 1050 | 120 | 0.9087 | 4.74 | 1.39·108 | 6.7 | 2.52·108 | -66 |
| 150 | 1050 | 120 | 0.9240 | 5.06 | 1.31·108 | 6.6 | 2.40·108 | -49 |
| 200 | 1050 | 120 | 0.9334 | 5.10 | 1.31·108 | 6.4 | 2.39·108 | -83 |
| 300 | 1050 | 120 | 0.9379 | 4.86 | 1.36·108 | 6.4 | 2.54·108 | -51 |
| 50 | 1050 | 300 | 0.9031 | 7.05 | 1.33·108 | 7.0 | 2.58·108 | -53 |
| 75 | 1050 | 300 | 0.9225 | 8.21 | 1.43·108 | 6.7 | 2.87·108 | -53 |
| 100 | 1050 | 300 | 0.9321 | 8.07 | 1.24·108 | 6.6 | 2.46·108 | -63 |
| 150 | 1050 | 300 | 0.9437 | 9.81 | 1.20·108 | 6.5 | 2.35·108 | -63 |
| 200 | 1050 | 300 | 0.9496 | 8.54 | 1.20·108 | 6.5 | 2.42·108 | -63 |
| 300 | 1050 | 300 | 0.9551 | 8.96 | 1.24·108 | 6.8 | 2.57·108 | -67 |
| 50 | 1050 | 900 | 0.9220 | 13.40 | 1.23·108 | 6.8 | 2.56·108 | -59 |
| 75 | 1050 | 900 | 0.9381 | 15.14 | 1.21·108 | 6.5 | 2.54·108 | -49 |
| 100 | 1050 | 900 | 0.9477 | 14.33 | 1.13·108 | 6.5 | 2.44·108 | -54 |
| 150 | 1050 | 900 | 0.9541 | 16.22 | 1.17·108 | 6.4 | 2.53·108 | -69 |
| 200 | 1050 | 900 | 0.9604 | 14.87 | 1.07·108 | 6.7 | 2.30·108 | -56 |
| 300 | 1050 | 900 | 0.9646 | 14.09 | 1.03·108 | 6.9 | 2.24·108 | -55 |
| 50 | 1050 | 1800 | 0.9258 | 13.97 | 1.31·108 | 6.7 | 2.84·108 | -53 |
| 75 | 1050 | 1800 | 0.9398 | 16.71 | 1.07·108 | 6.6 | 2.40·108 | -50 |
| 100 | 1050 | 1800 | 0.9467 | 17.10 | 1.14·108 | 6.4 | 2.54·108 | -53 |
| 150 | 1050 | 1800 | 0.9555 | 18.16 | 1.13·108 | 6.4 | 2.55·108 | -54 |
| 200 | 1050 | 1800 | 0.9578 | 17.05 | 1.04·108 | 6.8 | 2.35·108 | -52 |
| 300 | 1050 | 1800 | 0.9630 | 19.23 | 1.20·108 | 6.8 | 2.73·108 | -56 |

Supplementary Table . Sintered microstructural and electromagnetic wave absorption properties of the sintered Cu-doped Ni-Zn-polycrystalline ferrite: sintering temperature = 1075°C

| **P (MPa)** | **T (°C)** | **t (min)** | **φ** | **G (µm)** | **Matching frequency (Hz)** | **Matching thickness (mm)** | **Bandwidth for**  **RL ≤ -20 dB (Hz)** | **Minimum RL**  **(dB)** |
| --- | --- | --- | --- | --- | --- | --- | --- | --- |
| 50 | 1075 | 0 | 0.7164 | 1.32 | 2.86·108 | 9.2 | 2.95·108 | -54 |
| 75 | 1075 | 0 | 0.7408 | 1.28 | 2.56·108 | 8.6 | 2.79·108 | -60 |
| 100 | 1075 | 0 | 0.7516 | 1.25 | 2.48·108 | 8.4 | 2.71·108 | -56 |
| 150 | 1075 | 0 | 0.7699 | 1.20 | 2.43·108 | 8.0 | 2.74·108 | -55 |
| 200 | 1075 | 0 | 0.7785 | 1.15 | 2.41·108 | 7.8 | 2.65·108 | -51 |
| 300 | 1075 | 0 | 0.7817 | 1.11 | 2.64·108 | 7.9 | 2.82·108 | -59 |
| 50 | 1075 | 5 | 0.7757 | 1.74 | 2.16·108 | 8.0 | 2.71·108 | -55 |
| 75 | 1075 | 5 | 0.7983 | 1.73 | 2.03·108 | 7.6 | 2.66·108 | -54 |
| 100 | 1075 | 5 | 0.8122 | 1.72 | 1.95·108 | 7.4 | 2.56·108 | -59 |
| 150 | 1075 | 5 | 0.8266 | 1.72 | 1.91·108 | 7.2 | 2.52·108 | -57 |
| 200 | 1075 | 5 | 0.8357 | 1.71 | 1.97·108 | 7.1 | 2.59·108 | -63 |
| 300 | 1075 | 5 | 0.8343 | 1.70 | 2.14·108 | 7.1 | 2.66·108 | -52 |
| 50 | 1075 | 10 | 0.8054 | 2.10 | 1.99·108 | 7.8 | 2.72·108 | -60 |
| 75 | 1075 | 10 | 0.8348 | 2.16 | 1.78·108 | 7.4 | 2.54·108 | -64 |
| 100 | 1075 | 10 | 0.8477 | 2.23 | 1.77·108 | 7.1 | 2.54·108 | -54 |
| 150 | 1075 | 10 | 0.8642 | 2.18 | 1.70·108 | 6.9 | 2.47·108 | -65 |
| 200 | 1075 | 10 | 0.8719 | 2.09 | 1.77·108 | 6.8 | 2.55·108 | -51 |
| 300 | 1075 | 10 | 0.8711 | 2.05 | 1.77·108 | 6.8 | 2.41·108 | -63 |
| 50 | 1075 | 20 | 0.8440 | 3.41 | 1.73·108 | 7.5 | 2.61·108 | -57 |
| 75 | 1075 | 20 | 0.8692 | 3.55 | 1.61·108 | 7.0 | 2.60·108 | -51 |
| 100 | 1075 | 20 | 0.8802 | 3.68 | 1.55·108 | 6.9 | 2.51·108 | -64 |
| 150 | 1075 | 20 | 0.8970 | 3.64 | 1.49·108 | 6.7 | 2.40·108 | -58 |
| 200 | 1075 | 20 | 0.9034 | 3.61 | 1.52·108 | 6.6 | 2.48·108 | -66 |
| 300 | 1075 | 20 | 0.9051 | 3.60 | 1.58·108 | 6.6 | 2.49·108 | -63 |
| 50 | 1075 | 30 | 0.8619 | 3.89 | 1.58·108 | 7.3 | 2.57·108 | -59 |
| 75 | 1075 | 30 | 0.8890 | 3.10 | 1.46·108 | 7.0 | 2.48·108 | -61 |
| 100 | 1075 | 30 | 0.8980 | 4.22 | 1.45·108 | 6.8 | 2.49·108 | -60 |
| 150 | 1075 | 30 | 0.9122 | 4.49 | 1.43·108 | 6.7 | 2.48·108 | -51 |
| 200 | 1075 | 30 | 0.9192 | 4.73 | 1.63·108 | 6.5 | 2.97·108 | -50 |
| 300 | 1075 | 30 | 0.9220 | 4.95 | 1.42·108 | 6.6 | 2.39·108 | -49 |
| 50 | 1075 | 45 | 0.8786 | 4.68 | 1.46·108 | 7.2 | 2.55·108 | -59 |
| 75 | 1075 | 45 | 0.9017 | 4.95 | 1.48·108 | 6.9 | 2.69·108 | -68 |
| 100 | 1075 | 45 | 0.9118 | 5.49 | 1.33·108 | 6.8 | 2.40·108 | -72 |
| 150 | 1075 | 45 | 0.9241 | 5.42 | 1.35·108 | 6.6 | 2.42·108 | -54 |
| 200 | 1075 | 45 | 0.9296 | 5.39 | 1.31·108 | 6.6 | 2.37·108 | -55 |
| 300 | 1075 | 45 | 0.9327 | 5.37 | 1.32·108 | 6.6 | 2.32·108 | -63 |
| 50 | 1075 | 60 | 0.8887 | 5.44 | 1.38·108 | 7.2 | 2.48·108 | -55 |
| 75 | 1075 | 60 | 0.9091 | 5.79 | 1.31·108 | 6.9 | 2.44·108 | -51 |
| 100 | 1075 | 60 | 0.9175 | 6.14 | 1.33·108 | 6.7 | 2.52·108 | -59 |
| 150 | 1075 | 60 | 0.9304 | 6.25 | 1.31·108 | 6.5 | 2.42·108 | -50 |
| 200 | 1075 | 60 | 0.9368 | 6.41 | 1.30·108 | 6.5 | 2.42·108 | -55 |
| 300 | 1075 | 60 | 0.9407 | 6.56 | 1.28·108 | 6.8 | 2.41·108 | -62 |
| 50 | 1075 | 120 | 0.9069 | 7.66 | 1.30·108 | 7.0 | 2.50·108 | -61 |
| 75 | 1075 | 120 | 0.9224 | 8.09 | 1.24·108 | 6.7 | 2.41·108 | -50 |
| 100 | 1075 | 120 | 0.9326 | 8.30 | 1.23·108 | 6.6 | 2.44·108 | -61 |
| 150 | 1075 | 120 | 0.9439 | 9.26 | 1.22·108 | 6.5 | 2.43·108 | -56 |
| 200 | 1075 | 120 | 0.9486 | 9.70 | 1.21·108 | 6.5 | 2.39·108 | -55 |
| 300 | 1075 | 120 | 0.9532 | 9.95 | 1.15·108 | 6.9 | 2.26·108 | -58 |
| 50 | 1075 | 300 | 0.9202 | 11.32 | 1.17·108 | 6.9 | 2.43·108 | -53 |
| 75 | 1075 | 300 | 0.9361 | 12.25 | 1.15·108 | 6.6 | 2.37·108 | -51 |
| 100 | 1075 | 300 | 0.9451 | 13.01 | 1.15·108 | 6.5 | 2.42·108 | -59 |
| 150 | 1075 | 300 | 0.9536 | 12.92 | 1.16·108 | 6.5 | 2.47·108 | -56 |
| 200 | 1075 | 300 | 0.9576 | 12.82 | 1.11·108 | 6.7 | 2.38·108 | -50 |
| 300 | 1075 | 300 | 0.9615 | 12.72 | 1.09·108 | 6.9 | 2.37·108 | -64 |
| 50 | 1075 | 900 | 0.9289 | 15.26 | 1.10·108 | 6.7 | 2.44·108 | -54 |
| 75 | 1075 | 900 | 0.9436 | 16.00 | 1.10·108 | 6.5 | 2.49·108 | -50 |
| 100 | 1075 | 900 | 0.9511 | 16.65 | 1.04·108 | 6.4 | 2.30·108 | -58 |
| 150 | 1075 | 900 | 0.9582 | 16.26 | 1.03·108 | 6.5 | 2.28·108 | -65 |
| 200 | 1075 | 900 | 0.9624 | 16.04 | 9.89·107 | 6.7 | 2.28·108 | -49 |
| 300 | 1075 | 900 | 0.9662 | 15.98 | 9.79·107 | 6.8 | 2.20·108 | -65 |
| 50 | 1075 | 1800 | 0.9330 | 16.97 | 1.06·108 | 6.7 | 2.36·108 | -55 |
| 75 | 1075 | 1800 | 0.9475 | 17.22 | 1.04·108 | 6.4 | 2.35·108 | -56 |
| 100 | 1075 | 1800 | 0.9524 | 17.43 | 1.09·108 | 6.4 | 2.51·108 | -52 |
| 150 | 1075 | 1800 | 0.9593 | 18.08 | 9.98·107 | 6.6 | 2.31·108 | -72 |
| 200 | 1075 | 1800 | 0.9596 | 18.34 | 9.98·107 | 6.8 | 2.35·108 | -62 |
| 300 | 1075 | 1800 | 0.9634 | 19.00 | 9.79·107 | 6.8 | 2.26·108 | -56 |

Supplementary Table . Sintered microstructural and electromagnetic wave absorption properties of the sintered Cu-doped Ni-Zn-polycrystalline ferrite: sintering temperature = 1100°C

| **P (MPa)** | **T (°C)** | **t (min)** | **φ** | **G (µm)** | **Matching frequency (Hz)** | **Matching thickness (mm)** | **Bandwidth for**  **RL ≤ -20 dB (Hz)** | **Minimum RL**  **(dB)** |
| --- | --- | --- | --- | --- | --- | --- | --- | --- |
| 50 | 1100 | 0 | 0.7701 | 1.62 | 2.41·108 | 8.3 | 2.81·108 | -62 |
| 75 | 1100 | 0 | 0.7952 | 1.71 | 2.25·108 | 7.8 | 2.82·108 | -54 |
| 100 | 1100 | 0 | 0.8059 | 1.72 | 2.05·108 | 7.7 | 2.59·108 | -51 |
| 150 | 1100 | 0 | 0.8243 | 1.75 | 2.07·108 | 7.3 | 2.70·108 | -60 |
| 200 | 1100 | 0 | 0.8308 | 1.68 | 2.01·108 | 7.3 | 2.51·108 | -51 |
| 300 | 1100 | 0 | 0.8298 | 1.57 | 2.16·108 | 7.2 | 2.58·108 | -59 |
| 50 | 1100 | 5 | 0.8320 | 3.44 | 1.97·108 | 7.6 | 2.85·108 | -55 |
| 75 | 1100 | 5 | 0.8559 | 3.40 | 1.77·108 | 7.1 | 2.77·108 | -56 |
| 100 | 1100 | 5 | 0.8674 | 3.47 | 1.63·108 | 7.0 | 2.58·108 | -58 |
| 150 | 1100 | 5 | 0.8844 | 3.50 | 1.54·108 | 6.8 | 2.47·108 | -50 |
| 200 | 1100 | 5 | 0.8927 | 3.47 | 1.57·108 | 6.6 | 2.50·108 | -61 |
| 300 | 1100 | 5 | 0.8965 | 3.60 | 1.61·108 | 6.6 | 2.53·108 | -51 |
| 50 | 1100 | 10 | 0.8527 | 4.49 | 1.77·108 | 7.4 | 2.78·108 | -65 |
| 75 | 1100 | 10 | 0.8782 | 4.60 | 1.52·108 | 6.9 | 2.63·108 | -55 |
| 100 | 1100 | 10 | 0.8893 | 4.68 | 1.55·108 | 6.6 | 2.69·108 | -51 |
| 150 | 1100 | 10 | 0.9042 | 4.80 | 1.45·108 | 6.4 | 2.48·108 | -68 |
| 200 | 1100 | 10 | 0.9113 | 4.98 | 1.45·108 | 6.6 | 2.50·108 | -53 |
| 300 | 1100 | 10 | 0.9145 | 5.10 | 1.49·108 | 6.7 | 2.48·108 | -57 |
| 50 | 1100 | 20 | 0.8755 | 5.62 | 1.49·108 | 7.2 | 2.63·108 | -69 |
| 75 | 1100 | 20 | 0.8979 | 5.80 | 1.43·108 | 6.9 | 2.60·108 | -77 |
| 100 | 1100 | 20 | 0.9081 | 6.06 | 1.39·108 | 6.8 | 2.51·108 | -60 |
| 150 | 1100 | 20 | 0.9214 | 6.30 | 1.39·108 | 6.3 | 2.60·108 | -60 |
| 200 | 1100 | 20 | 0.9281 | 6.46 | 1.35·108 | 6.5 | 2.48·108 | -54 |
| 300 | 1100 | 20 | 0.9334 | 6.70 | 1.43·108 | 6.6 | 2.63·108 | -50 |
| 50 | 1100 | 30 | 0.8834 | 6.46 | 1.48·108 | 7.3 | 2.65·108 | -67 |
| 75 | 1100 | 30 | 0.9061 | 6.90 | 1.33·108 | 7.0 | 2.51·108 | -59 |
| 100 | 1100 | 30 | 0.9152 | 7.36 | 1.32·108 | 6.8 | 2.49·108 | -65 |
| 150 | 1100 | 30 | 0.9292 | 7.40 | 1.31·108 | 6.6 | 2.49·108 | -50 |
| 200 | 1100 | 30 | 0.9372 | 7.49 | 1.28·108 | 6.5 | 2.45·108 | -56 |
| 300 | 1100 | 30 | 0.9428 | 7.60 | 1.26·108 | 6.8 | 2.37·108 | -57 |
| 50 | 1100 | 45 | 0.8962 | 7.62 | 1.30·108 | 7.2 | 2.47·108 | -51 |
| 75 | 1100 | 45 | 0.9173 | 8.00 | 1.31·108 | 6.7 | 2.57·108 | -62 |
| 100 | 1100 | 45 | 0.9262 | 8.45 | 1.27·108 | 6.7 | 2.45·108 | -52 |
| 150 | 1100 | 45 | 0.9379 | 8.90 | 1.24·108 | 6.6 | 2.47·108 | -50 |
| 200 | 1100 | 45 | 0.9433 | 9.04 | 1.22·108 | 6.6 | 2.40·108 | -75 |
| 300 | 1100 | 45 | 0.9495 | 9.20 | 1.21·108 | 6.8 | 2.36·108 | -50 |
| 50 | 1100 | 60 | 0.9007 | 8.64 | 1.31·108 | 7.2 | 2.50·108 | -67 |
| 75 | 1100 | 60 | 0.9184 | 9.10 | 1.22·108 | 6.9 | 2.41·108 | -54 |
| 100 | 1100 | 60 | 0.9301 | 10.24 | 1.21·108 | 6.7 | 2.41·108 | -52 |
| 150 | 1100 | 60 | 0.9409 | 10.20 | 1.21·108 | 6.5 | 2.40·108 | -58 |
| 200 | 1100 | 60 | 0.9462 | 10.33 | 1.22·108 | 6.6 | 2.44·108 | -54 |
| 300 | 1100 | 60 | 0.9525 | 10.40 | 1.14·108 | 6.9 | 2.27·108 | -50 |
| 50 | 1100 | 120 | 0.9122 | 11.14 | 1.28·108 | 7.1 | 2.58·108 | -55 |
| 75 | 1100 | 120 | 0.9307 | 11.90 | 1.15·108 | 6.8 | 2.37·108 | -57 |
| 100 | 1100 | 120 | 0.9380 | 12.60 | 1.15·108 | 6.7 | 2.36·108 | -59 |
| 150 | 1100 | 120 | 0.9462 | 12.90 | 1.21·108 | 6.5 | 2.53·108 | -56 |
| 200 | 1100 | 120 | 0.9542 | 13.47 | 1.20·108 | 6.7 | 2.53·108 | -56 |
| 300 | 1100 | 120 | 0.9573 | 13.70 | 1.07·108 | 6.9 | 2.27·108 | -52 |
| 50 | 1100 | 300 | 0.9214 | 15.50 | 1.13·108 | 7.0 | 2.36·108 | -60 |
| 75 | 1100 | 300 | 0.9381 | 15.90 | 1.09·108 | 6.7 | 2.31·108 | -64 |
| 100 | 1100 | 300 | 0.9464 | 16.87 | 1.14·108 | 6.6 | 2.42·108 | -61 |
| 150 | 1100 | 300 | 0.9549 | 16.90 | 1.07·108 | 6.7 | 2.33·108 | -70 |
| 200 | 1100 | 300 | 0.9598 | 16.94 | 1.06·108 | 6.8 | 2.38·108 | -50 |
| 300 | 1100 | 300 | 0.9643 | 17.10 | 1.08·108 | 6.8 | 2.40·108 | -54 |
| 50 | 1100 | 900 | 0.9276 | 19.42 | 1.08·108 | 6.9 | 2.37·108 | -69 |
| 75 | 1100 | 900 | 0.9425 | 19.90 | 1.03·108 | 6.7 | 2.34·108 | -53 |
| 100 | 1100 | 900 | 0.9507 | 20.15 | 1.05·108 | 6.6 | 2.42·108 | -50 |
| 150 | 1100 | 900 | 0.9584 | 20.20 | 1.05·108 | 6.6 | 2.41·108 | -57 |
| 200 | 1100 | 900 | 0.9610 | 20.19 | 9.89·107 | 6.8 | 2.27·108 | -59 |
| 300 | 1100 | 900 | 0.9639 | 20.30 | 1.01·108 | 6.8 | 2.36·108 | -66 |
| 50 | 1100 | 1800 | 0.9302 | 20.51 | 1.05·108 | 6.9 | 2.39·108 | -62 |
| 75 | 1100 | 1800 | 0.9444 | 20.94 | 1.04·108 | 6.6 | 2.39·108 | -59 |
| 100 | 1100 | 1800 | 0.9518 | 21.10 | 9.98·107 | 6.7 | 2.34·108 | -71 |
| 150 | 1100 | 1800 | 0.9600 | 23.15 | 9.79·107 | 6.7 | 2.32·108 | -61 |
| 200 | 1100 | 1800 | 0.9634 | 22.70 | 9.59·107 | 6.8 | 2.26·108 | -76 |
| 300 | 1100 | 1800 | 0.9672 | 22.04 | 9.69·107 | 6.8 | 2.30·108 | -64 |

Supplementary Table . Sintered microstructural and electromagnetic wave absorption properties of the sintered Cu-doped Ni-Zn-polycrystalline ferrite: sintering temperature = 1150°C

| **P (MPa)** | **T (°C)** | **t (min)** | **φ** | **G (µm)** | **Matching frequency (Hz)** | **Matching thickness (mm)** | **Bandwidth for**  **RL ≤ -20 dB (Hz)** | **Minimum RL**  **(dB)** |
| --- | --- | --- | --- | --- | --- | --- | --- | --- |
| 50 | 1150 | 0 | 0.8960 | 5.95 | 1.57·108 | 7.3 | 2.57·108 | -51 |
| 75 | 1150 | 0 | 0.9146 | 5.50 | 1.42·108 | 6.9 | 2.45·108 | -58 |
| 100 | 1150 | 0 | 0.9239 | 5.34 | 1.39·108 | 6.8 | 2.43·108 | -50 |
| 150 | 1150 | 0 | 0.9329 | 5.10 | 1.36·108 | 6.6 | 2.41·108 | -50 |
| 200 | 1150 | 0 | 0.9369 | 4.95 | 1.40·108 | 6.7 | 2.46·108 | -51 |
| 300 | 1150 | 0 | 0.9352 | 4.70 | 1.40·108 | 6.7 | 2.41·108 | -52 |
| 50 | 1150 | 5 | 0.9116 | 110.31 | 1.46·108 | 7.9 | 2.49·108 | -59 |
| 75 | 1150 | 5 | 0.9271 | 108.10 | 1.30·108 | 7.7 | 2.23·108 | -58 |
| 100 | 1150 | 5 | 0.9363 | 102.63 | 1.22·108 | 7.6 | 2.13·108 | -58 |
| 150 | 1150 | 5 | 0.9474 | 89.80 | 1.22·108 | 7.5 | 2.26·108 | -64 |
| 200 | 1150 | 5 | 0.9514 | 74.29 | 1.17·108 | 7.3 | 2.19·108 | -65 |
| 300 | 1150 | 5 | 0.9535 | 59.50 | 1.16·108 | 7.2 | 2.30·108 | -59 |
| 50 | 1150 | 10 | 0.9081 | 101.00 | 1.36·108 | 8.1 | 2.20·108 | -52 |
| 75 | 1150 | 10 | 0.9262 | 142.60 | 1.24·108 | 8.0 | 2.14·108 | -51 |
| 100 | 1150 | 10 | 0.9356 | 162.41 | 1.20·108 | 7.8 | 2.10·108 | -51 |
| 150 | 1150 | 10 | 0.9458 | 149.40 | 1.17·108 | 7.6 | 2.16·108 | -51 |
| 200 | 1150 | 10 | 0.9517 | 106.82 | 1.13·108 | 7.6 | 2.17·108 | -53 |
| 300 | 1150 | 10 | 0.9559 | 100.00 | 1.16·108 | 7.2 | 2.23·108 | -59 |
| 50 | 1150 | 20 | 0.9110 | 99.50 | 1.33·108 | 8.1 | 2.26·108 | -59 |
| 75 | 1150 | 20 | 0.9296 | 99.60 | 1.24·108 | 8.0 | 2.16·108 | -58 |
| 100 | 1150 | 20 | 0.9363 | 99.71 | 1.20·108 | 7.9 | 2.12·108 | -51 |
| 150 | 1150 | 20 | 0.9453 | 111.00 | 1.14·108 | 7.8 | 2.15·108 | -53 |
| 200 | 1150 | 20 | 0.9515 | 132.56 | 1.11·108 | 7.6 | 2.13·108 | -61 |
| 300 | 1150 | 20 | 0.9572 | 145.00 | 1.14·108 | 7.2 | 2.28·108 | -54 |
| 50 | 1150 | 30 | 0.9101 | 76.18 | 1.40·108 | 8.1 | 2.43·108 | -60 |
| 75 | 1150 | 30 | 0.9271 | 89.98 | 1.23·108 | 7.9 | 2.18·108 | -54 |
| 100 | 1150 | 30 | 0.9364 | 117.86 | 1.16·108 | 7.8 | 2.12·108 | -53 |
| 150 | 1150 | 30 | 0.9469 | 121.80 | 1.11·108 | 7.7 | 2.09·108 | -66 |
| 200 | 1150 | 30 | 0.9529 | 128.95 | 1.15·108 | 7.4 | 2.18·108 | -51 |
| 300 | 1150 | 30 | 0.9582 | 130.50 | 1.09·108 | 7.2 | 2.22·108 | -51 |
| 50 | 1150 | 45 | 0.9121 | 106.50 | 1.27·108 | 8.1 | 2.22·108 | -59 |
| 75 | 1150 | 45 | 0.9296 | 109.90 | 1.21·108 | 7.9 | 2.23·108 | -51 |
| 100 | 1150 | 45 | 0.9380 | 114.51 | 1.16·108 | 7.8 | 2.15·108 | -54 |
| 150 | 1150 | 45 | 0.9483 | 125.00 | 1.11·108 | 7.7 | 2.15·108 | -69 |
| 200 | 1150 | 45 | 0.9529 | 134.40 | 1.09·108 | 7.6 | 2.16·108 | -54 |
| 300 | 1150 | 45 | 0.9591 | 141.00 | 1.07·108 | 7.4 | 2.19·108 | -56 |
| 50 | 1150 | 60 | 0.9111 | 105.43 | 1.30·108 | 8.2 | 2.27·108 | -60 |
| 75 | 1150 | 60 | 0.9283 | 128.70 | 1.22·108 | 8.0 | 2.22·108 | -69 |
| 100 | 1150 | 60 | 0.9375 | 137.07 | 1.15·108 | 7.9 | 2.14·108 | -63 |
| 150 | 1150 | 60 | 0.9466 | 132.20 | 1.05·108 | 7.8 | 2.13·108 | -52 |
| 200 | 1150 | 60 | 0.9528 | 130.45 | 1.07·108 | 7.6 | 2.15·108 | -56 |
| 300 | 1150 | 60 | 0.9582 | 128.90 | 1.13·108 | 7.2 | 2.23·108 | -50 |
| 50 | 1150 | 120 | 0.9091 | 106.96 | 1.21·108 | 8.3 | 2.23·108 | -51 |
| 75 | 1150 | 120 | 0.9276 | 110.70 | 1.18·108 | 8.1 | 2.25·108 | -54 |
| 100 | 1150 | 120 | 0.9359 | 112.11 | 1.15·108 | 7.9 | 2.27·108 | -63 |
| 150 | 1150 | 120 | 0.9463 | 131.40 | 1.05·108 | 7.8 | 2.10·108 | -52 |
| 200 | 1150 | 120 | 0.9514 | 142.88 | 1.07·108 | 7.6 | 2.21·108 | -53 |
| 300 | 1150 | 120 | 0.9582 | 145.80 | 1.13·108 | 7.2 | 2.42·108 | -50 |
| 50 | 1150 | 300 | 0.9095 | 112.88 | 1.24·108 | 8.4 | 2.38·108 | -64 |
| 75 | 1150 | 300 | 0.9297 | 108.20 | 1.09·108 | 8.1 | 2.24·108 | -53 |
| 100 | 1150 | 300 | 0.9372 | 100.38 | 1.06·108 | 7.9 | 2.17·108 | -60 |
| 150 | 1150 | 300 | 0.9474 | 125.40 | 1.05·108 | 7.8 | 2.26·108 | -53 |
| 200 | 1150 | 300 | 0.9530 | 144.05 | 1.04·108 | 7.4 | 2.21·108 | -52 |
| 300 | 1150 | 300 | 0.9582 | 150.20 | 1.03·108 | 7.2 | 2.26·108 | -59 |
| 50 | 1150 | 900 | 0.9126 | 138.47 | 1.15·108 | 8.0 | 2.42·108 | -55 |
| 75 | 1150 | 900 | 0.9309 | 133.00 | 1.07·108 | 7.9 | 2.29·108 | -65 |
| 100 | 1150 | 900 | 0.9385 | 135.00 | 1.04·108 | 7.7 | 2.26·108 | -55 |
| 150 | 1150 | 900 | 0.9474 | 132.10 | 1.03·108 | 7.6 | 2.29·108 | -60 |
| 200 | 1150 | 900 | 0.9543 | 129.74 | 1.06·108 | 7.3 | 2.38·108 | -55 |
| 300 | 1150 | 900 | 0.9605 | 125.80 | 1.01·108 | 7.3 | 2.26·108 | -70 |
| 50 | 1150 | 1800 | 0.9110 | 113.23 | 1.13·108 | 8.0 | 2.37·108 | -57 |
| 75 | 1150 | 1800 | 0.9284 | 118.90 | 1.06·108 | 7.8 | 2.34·108 | -66 |
| 100 | 1150 | 1800 | 0.9376 | 121.00 | 1.01·108 | 7.7 | 2.24·108 | -57 |
| 150 | 1150 | 1800 | 0.9470 | 125.58 | 1.02·108 | 7.5 | 2.24·108 | -54 |
| 200 | 1150 | 1800 | 0.9521 | 127.69 | 1.02·108 | 7.4 | 2.29·108 | -51 |
| 300 | 1150 | 1800 | 0.9580 | 130.20 | 1.05·108 | 7.2 | 2.34·108 | -59 |

Supplementary Table . Sintered microstructural and electromagnetic wave absorption properties of the sintered Cu-doped Ni-Zn-polycrystalline ferrite: sintering temperature = 1200°C

| **P (MPa)** | **T (°C)** | **t (min)** | **φ** | **G (µm)** | **Matching frequency (Hz)** | **Matching thickness (mm)** | **Bandwidth for**  **RL ≤ -20 dB (Hz)** | **Minimum RL**  **(dB)** |
| --- | --- | --- | --- | --- | --- | --- | --- | --- |
| 50 | 1200 | 0 | 0.9172 | 140.00 | 1.43·108 | 8.3 | 2.19·108 | -58 |
| 75 | 1200 | 0 | 0.9312 | 160.00 | 1.36·108 | 7.8 | 2.24·108 | -53 |
| 100 | 1200 | 0 | 0.9403 | 120.00 | 1.24·108 | 7.9 | 2.11·108 | -59 |
| 150 | 1200 | 0 | 0.9483 | 150.00 | 1.17·108 | 7.8 | 2.09·108 | -60 |
| 200 | 1200 | 0 | 0.9529 | 110.00 | 1.11·108 | 7.8 | 2.07·108 | -52 |
| 300 | 1200 | 0 | 0.9570 | 110.00 | 1.15·108 | 7.5 | 2.07·108 | -54 |
| 50 | 1200 | 5 | 0.9124 | 120.00 | 1.46·108 | 8.3 | 2.31·108 | -57 |
| 75 | 1200 | 5 | 0.9290 | 111.11 | 1.36·108 | 8.2 | 2.27·108 | -56 |
| 100 | 1200 | 5 | 0.9373 | 112.99 | 1.22·108 | 8.1 | 2.06·108 | -65 |
| 150 | 1200 | 5 | 0.9468 | 100.00 | 1.26·108 | 7.7 | 2.22·108 | -52 |
| 200 | 1200 | 5 | 0.9533 | 109.89 | 1.20·108 | 7.6 | 2.14·108 | -62 |
| 300 | 1200 | 5 | 0.9575 | 90.00 | 1.24·108 | 7.4 | 2.34·108 | -64 |
| 50 | 1200 | 10 | 0.9153 | 122.64 | 1.57·108 | 8.0 | 2.42·108 | -65 |
| 75 | 1200 | 10 | 0.9314 | 124.00 | 1.32·108 | 7.8 | 2.11·108 | -53 |
| 100 | 1200 | 10 | 0.9395 | 125.00 | 1.27·108 | 7.7 | 2.08·108 | -57 |
| 150 | 1200 | 10 | 0.9485 | 127.00 | 1.21·108 | 7.6 | 2.14·108 | -56 |
| 200 | 1200 | 10 | 0.9538 | 128.87 | 1.17·108 | 7.6 | 2.08·108 | -63 |
| 300 | 1200 | 10 | 0.9588 | 130.00 | 1.20·108 | 7.4 | 2.29·108 | -58 |
| 50 | 1200 | 20 | 0.9147 | 124.20 | 1.31·108 | 8.4 | 2.09·108 | -52 |
| 75 | 1200 | 20 | 0.9300 | 122.00 | 1.23·108 | 8.1 | 2.06·108 | -57 |
| 100 | 1200 | 20 | 0.9388 | 120.00 | 1.18·108 | 8.1 | 2.08·108 | -58 |
| 150 | 1200 | 20 | 0.9475 | 118.00 | 1.13·108 | 7.9 | 2.05·108 | -53 |
| 200 | 1200 | 20 | 0.9524 | 114.70 | 1.11·108 | 7.9 | 2.11·108 | -52 |
| 300 | 1200 | 20 | 0.9575 | 114.00 | 1.08·108 | 7.7 | 2.09·108 | -61 |
| 50 | 1200 | 30 | 0.9136 | 140.00 | 1.30·108 | 8.4 | 2.09·108 | -54 |
| 75 | 1200 | 30 | 0.9314 | 138.00 | 1.22·108 | 8.3 | 2.03·108 | -53 |
| 100 | 1200 | 30 | 0.9389 | 134.00 | 1.16·108 | 8.2 | 2.03·108 | -52 |
| 150 | 1200 | 30 | 0.9474 | 131.00 | 1.17·108 | 7.9 | 2.18·108 | -56 |
| 200 | 1200 | 30 | 0.9524 | 125.41 | 1.15·108 | 7.7 | 2.18·108 | -56 |
| 300 | 1200 | 30 | 0.9578 | 124.00 | 1.08·108 | 7.6 | 2.14·108 | -56 |
| 50 | 1200 | 45 | 0.9144 | 136.28 | 1.33·108 | 8.3 | 2.19·108 | -51 |
| 75 | 1200 | 45 | 0.9301 | 135.00 | 1.26·108 | 8.1 | 2.17·108 | -60 |
| 100 | 1200 | 45 | 0.9392 | 134.00 | 1.16·108 | 8.1 | 2.06·108 | -51 |
| 150 | 1200 | 45 | 0.9485 | 132.00 | 1.15·108 | 7.8 | 2.12·108 | -52 |
| 200 | 1200 | 45 | 0.9531 | 130.00 | 1.13·108 | 7.8 | 2.14·108 | -59 |
| 300 | 1200 | 45 | 0.9591 | 129.00 | 2.29·109 | 1.8 | 2.14·108 | -36 |
| 50 | 1200 | 60 | 0.9148 | 160.48 | 1.31·108 | 8.3 | 2.17·108 | -55 |
| 75 | 1200 | 60 | 0.9302 | 155.00 | 1.22·108 | 8.1 | 2.12·108 | -54 |
| 100 | 1200 | 60 | 0.9391 | 150.00 | 1.20·108 | 8.2 | 2.16·108 | -63 |
| 150 | 1200 | 60 | 0.9481 | 148.00 | 1.10·108 | 8.0 | 2.03·108 | -61 |
| 200 | 1200 | 60 | 0.9533 | 140.93 | 1.09·108 | 7.8 | 2.06·108 | -65 |
| 300 | 1200 | 60 | 0.9584 | 138.00 | 1.14·108 | 7.6 | 2.27·108 | -55 |
| 50 | 1200 | 120 | 0.9141 | 161.23 | 1.27·108 | 8.3 | 2.21·108 | -57 |
| 75 | 1200 | 120 | 0.9311 | 150.00 | 1.28·108 | 7.4 | 2.37·108 | -52 |
| 100 | 1200 | 120 | 0.9392 | 138.00 | 1.21·108 | 7.7 | 2.24·108 | -54 |
| 150 | 1200 | 120 | 0.9487 | 130.00 | 1.10·108 | 7.9 | 2.04·108 | -62 |
| 200 | 1200 | 120 | 0.9532 | 120.00 | 1.05·108 | 8.2 | 1.97·108 | -62 |
| 300 | 1200 | 120 | 0.9583 | 115.00 | 9.89·107 | 8.4 | 1.89·108 | -65 |
| 50 | 1200 | 300 | 0.9174 | 140.00 | 1.17·108 | 8.4 | 2.08·108 | -56 |
| 75 | 1200 | 300 | 0.9318 | 150.00 | 1.14·108 | 8.3 | 2.02·108 | -62 |
| 100 | 1200 | 300 | 0.9403 | 150.00 | 1.10·108 | 8.2 | 2.07·108 | -54 |
| 150 | 1200 | 300 | 0.9485 | 132.83 | 1.11·108 | 7.8 | 2.17·108 | -51 |
| 200 | 1200 | 300 | 0.9535 | 120.00 | 1.09·108 | 7.8 | 2.18·108 | -55 |
| 300 | 1200 | 300 | 0.9593 | 100.00 | 1.08·108 | 7.5 | 2.26·108 | -69 |
| 50 | 1200 | 900 | 0.9172 | 160.00 | 1.10·108 | 8.3 | 2.23·108 | -60 |
| 75 | 1200 | 900 | 0.9325 | 150.00 | 1.08·108 | 8.0 | 2.22·108 | -53 |
| 100 | 1200 | 900 | 0.9394 | 146.00 | 1.07·108 | 7.9 | 2.24·108 | -51 |
| 150 | 1200 | 900 | 0.9480 | 131.00 | 1.07·108 | 7.7 | 2.35·108 | -54 |
| 200 | 1200 | 900 | 0.9544 | 122.07 | 1.04·108 | 7.5 | 2.27·108 | -59 |
| 300 | 1200 | 900 | 0.9577 | 118.00 | 1.01·108 | 7.3 | 2.29·108 | -53 |
| 50 | 1200 | 1800 | 0.9091 | 160.00 | 1.05·108 | 8.6 | 2.20·108 | -68 |
| 75 | 1200 | 1800 | 0.9265 | 153.00 | 1.04·108 | 8.2 | 2.24·108 | -55 |
| 100 | 1200 | 1800 | 0.9344 | 149.00 | 1.05·108 | 8.0 | 2.21·108 | -56 |
| 150 | 1200 | 1800 | 0.9443 | 135.00 | 1.07·108 | 7.8 | 2.35·108 | -55 |
| 200 | 1200 | 1800 | 0.9487 | 120.77 | 1.18·108 | 7.8 | 2.73·108 | -56 |
| 300 | 1200 | 1800 | 0.9532 | 116.00 | 1.07·108 | 7.4 | 2.55·108 | -63 |


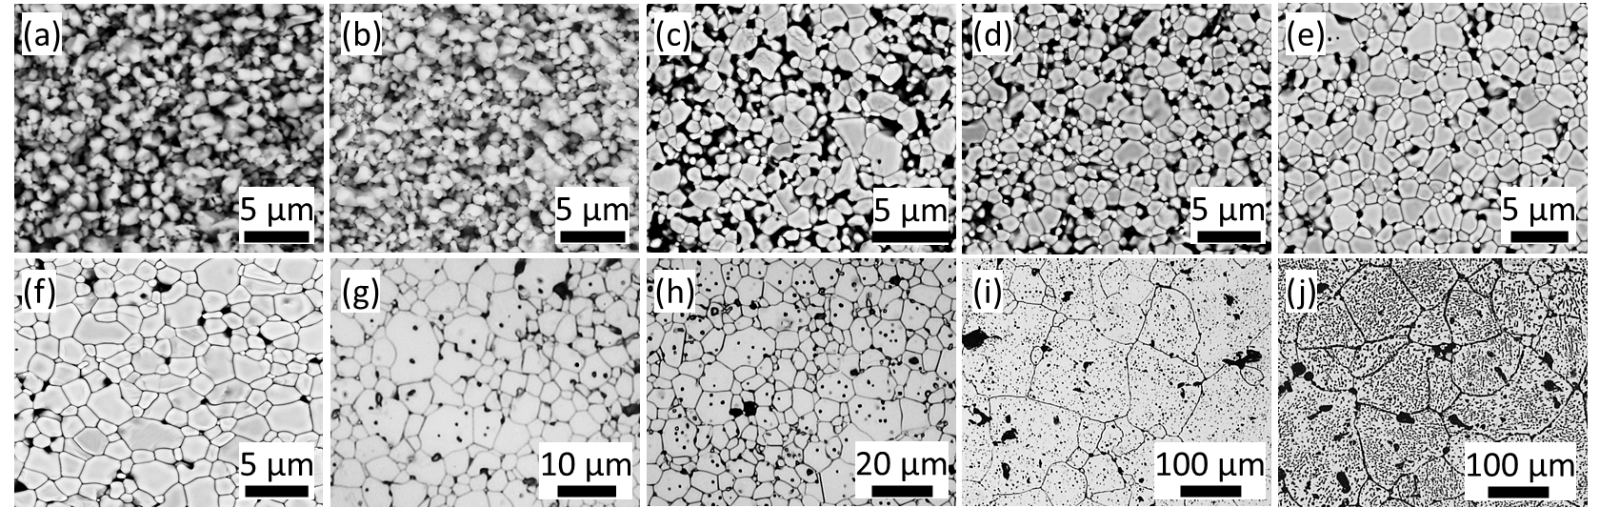


Supplementary Fig. 1. SEM images of the polished and etched cross-section areas of the sintered specimens at 900° (a), 950° (b), 975° (c), 1000° (d), 1025° (e), 1050° (f), 1075° (g), 1100° (h), 1150° (i) and 1200°C (j). (P= 200 MPa and t= 30min)


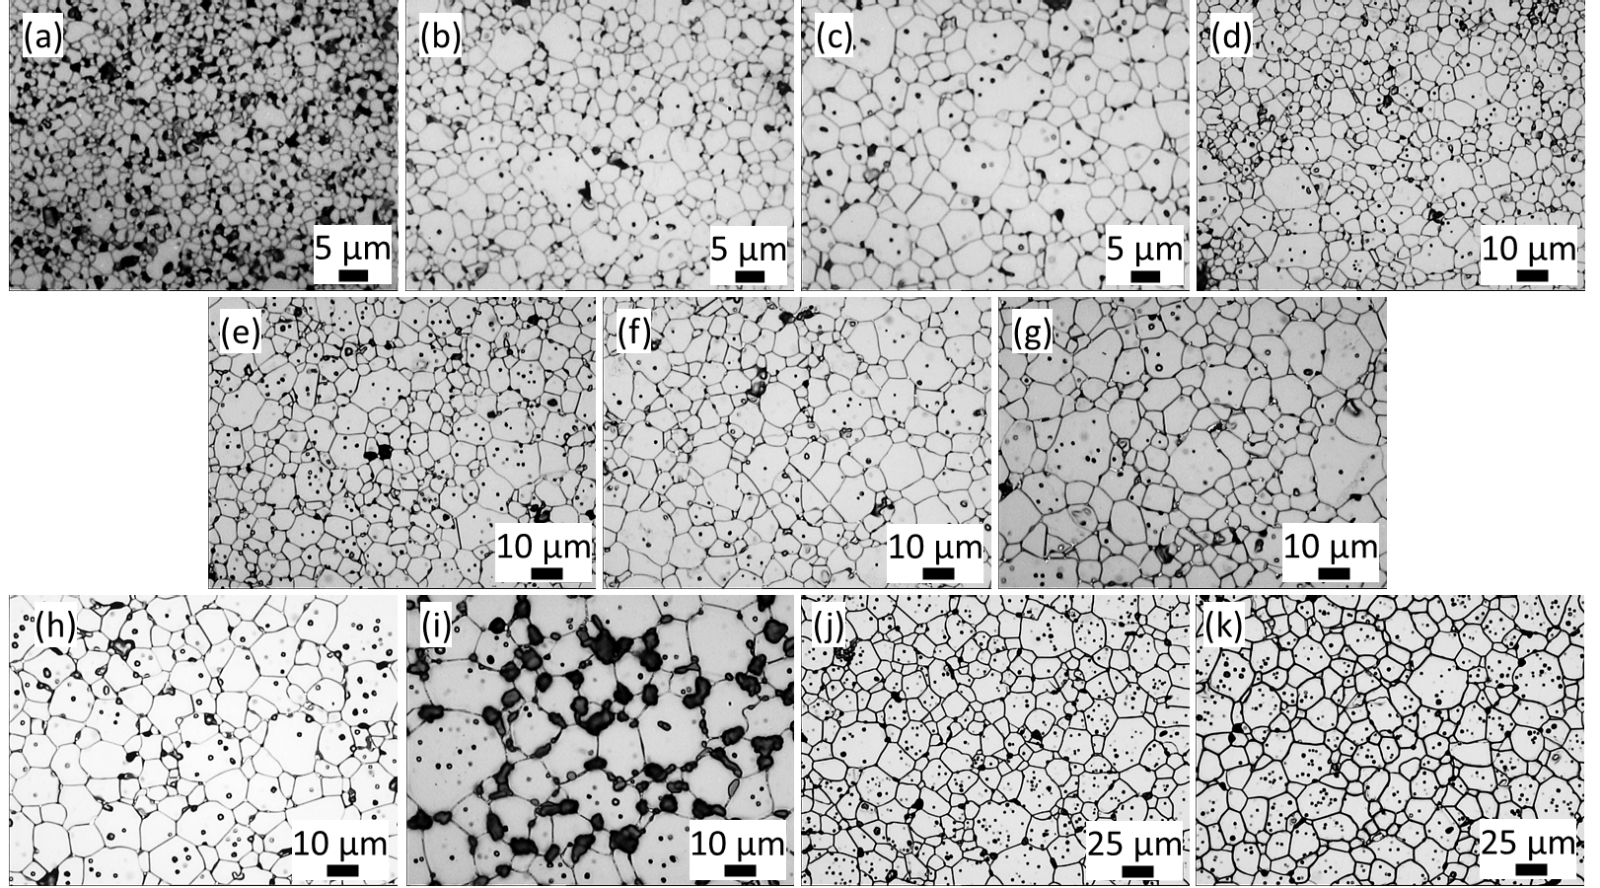


Supplementary Fig. 2. SEM images of the polished and etched cross-section areas of the sintered specimens at 0 (a), 5 (b), 10 (c), 20 (d), 30 (e) and 45 min (f) and 1 (g), 2 (h), 5 (i), 15 (j) and 30 h (k). (P= 200 MPa and T= 1100ºC)


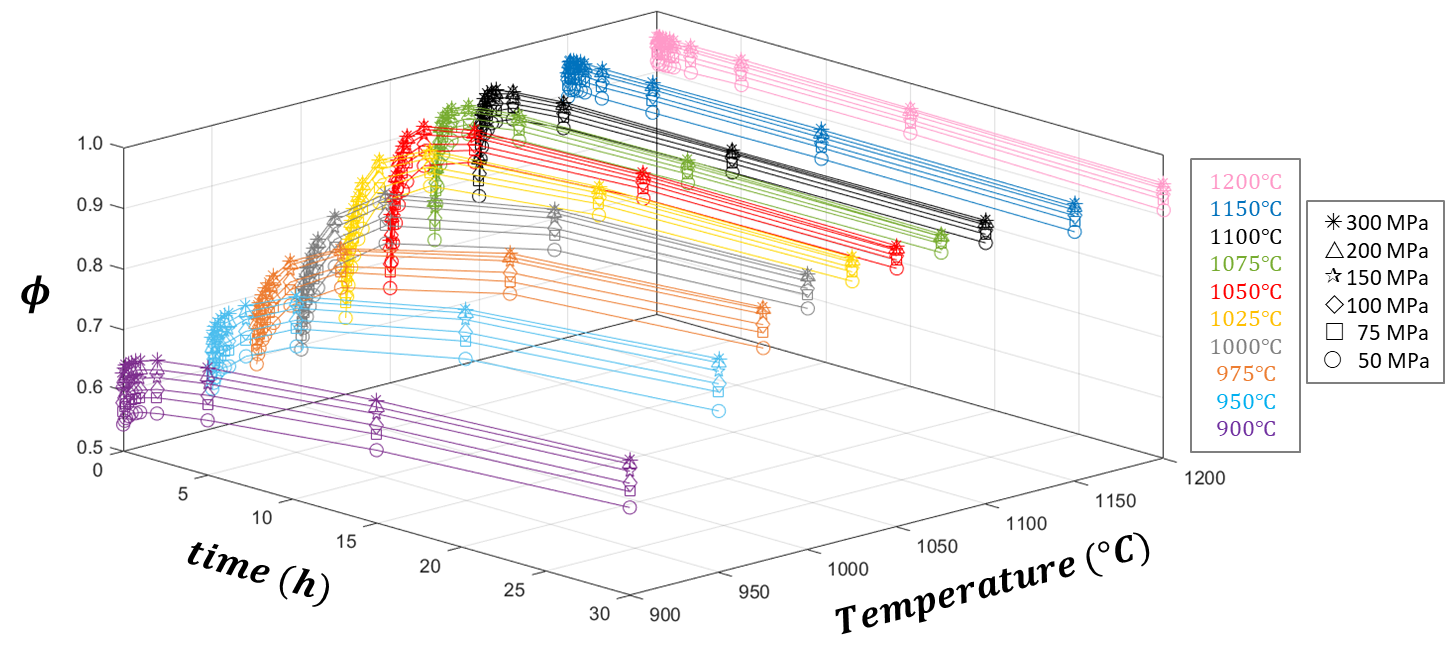


Supplementary Fig. 3. Process parameter (pressing pressure , sintering temperature and sintering time ) dependence of relative density of the sintered Cu-doped Ni-Zn-polycrystalline ferrite.


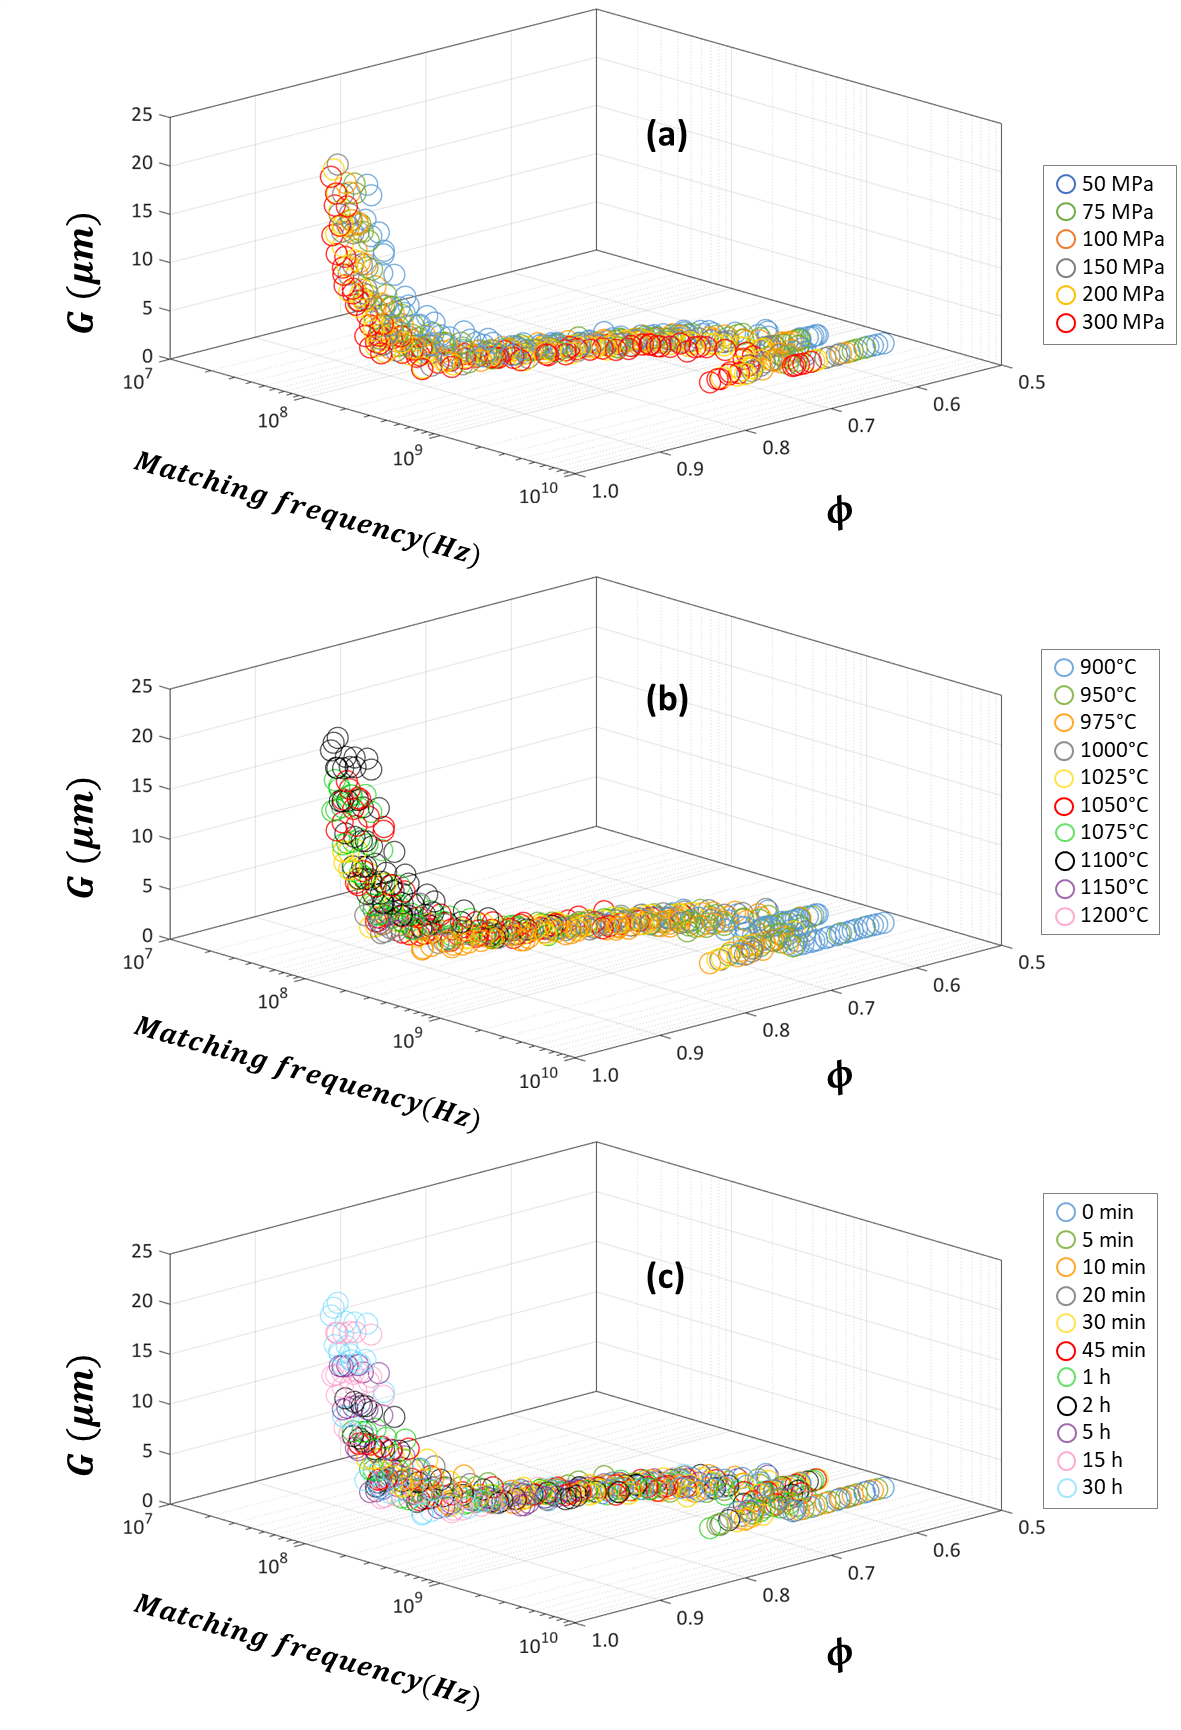


Supplementary Fig. 4. Sintered microstructure (relative density and average grain size ) dependence of matching frequency of the sintered Cu-doped Ni-Zn-polycrystalline ferrite. Effect of pressing pressure (a), sintering temperature (b) and sintering time (c).


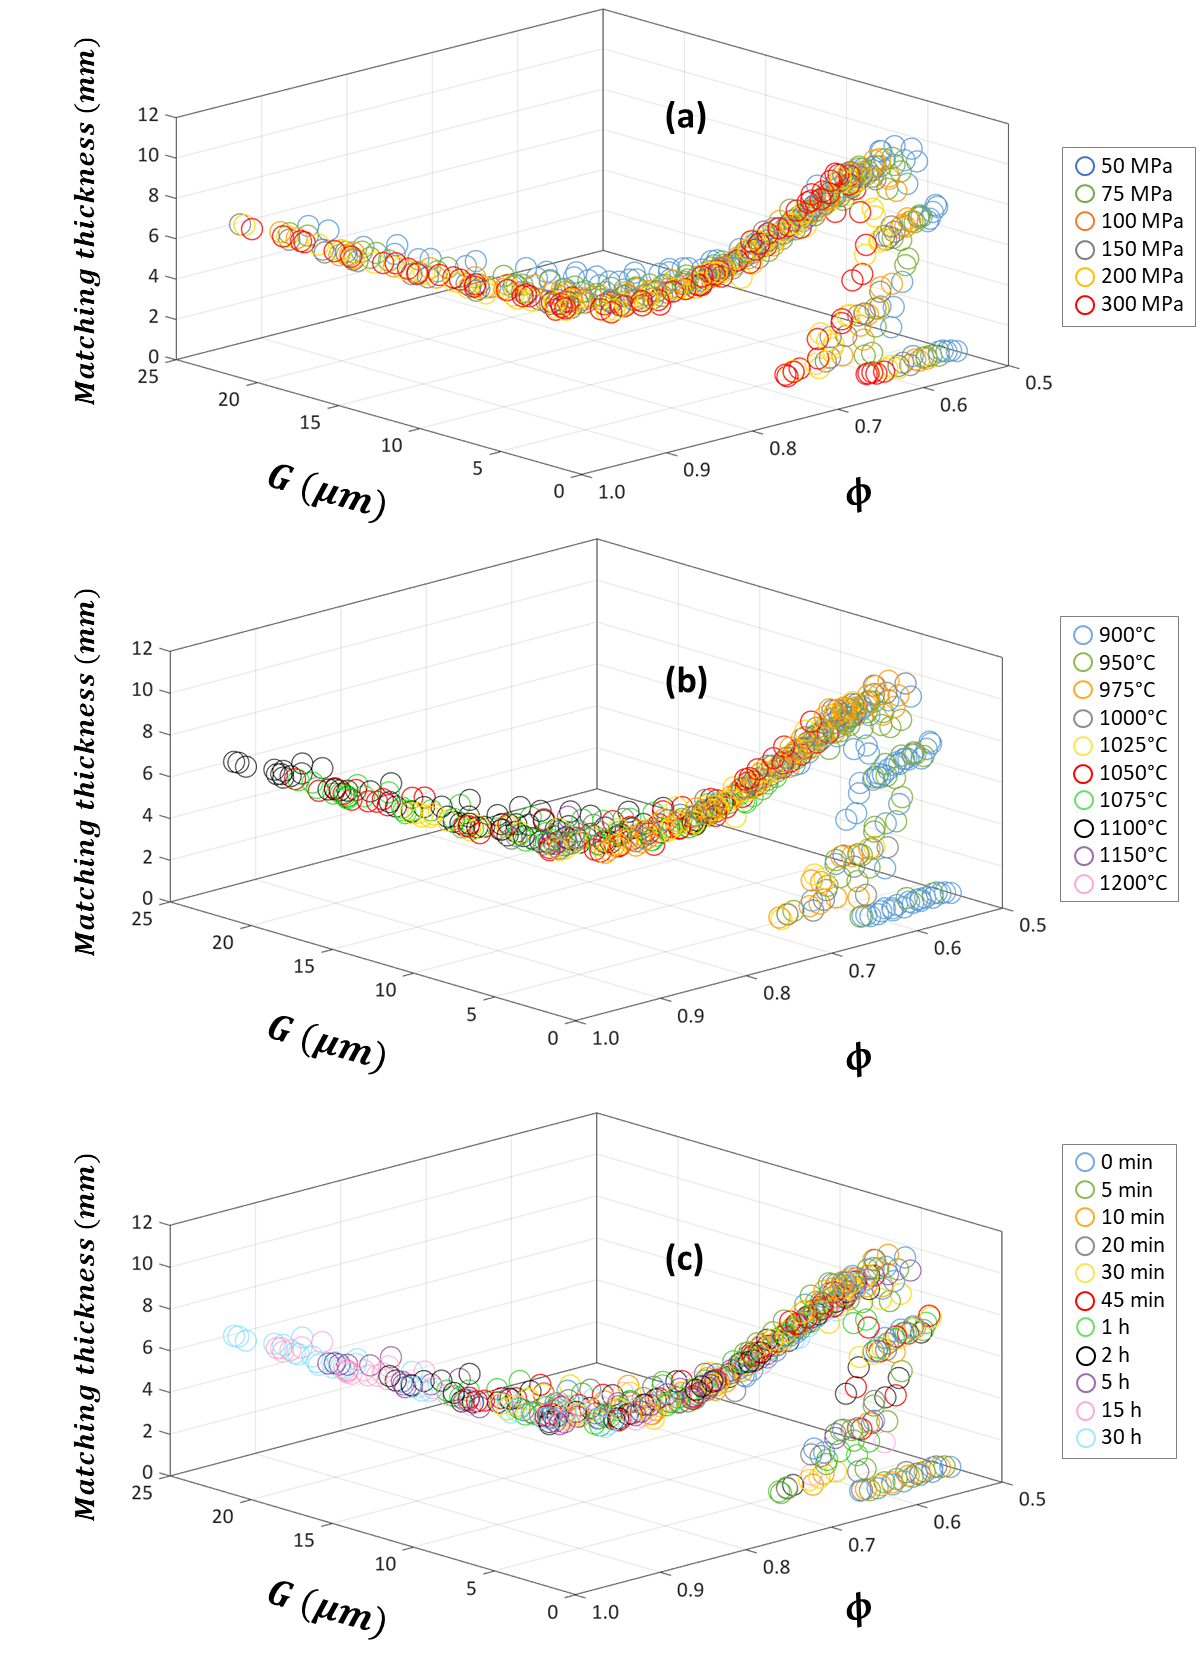


Supplementary Fig. 5. Sintered microstructure (relative density and average grain size ) dependence of matching thickness of the sintered Cu-doped Ni-Zn-polycrystalline ferrite. Effect of pressing pressure (a), sintering temperature (b) and sintering time (c).


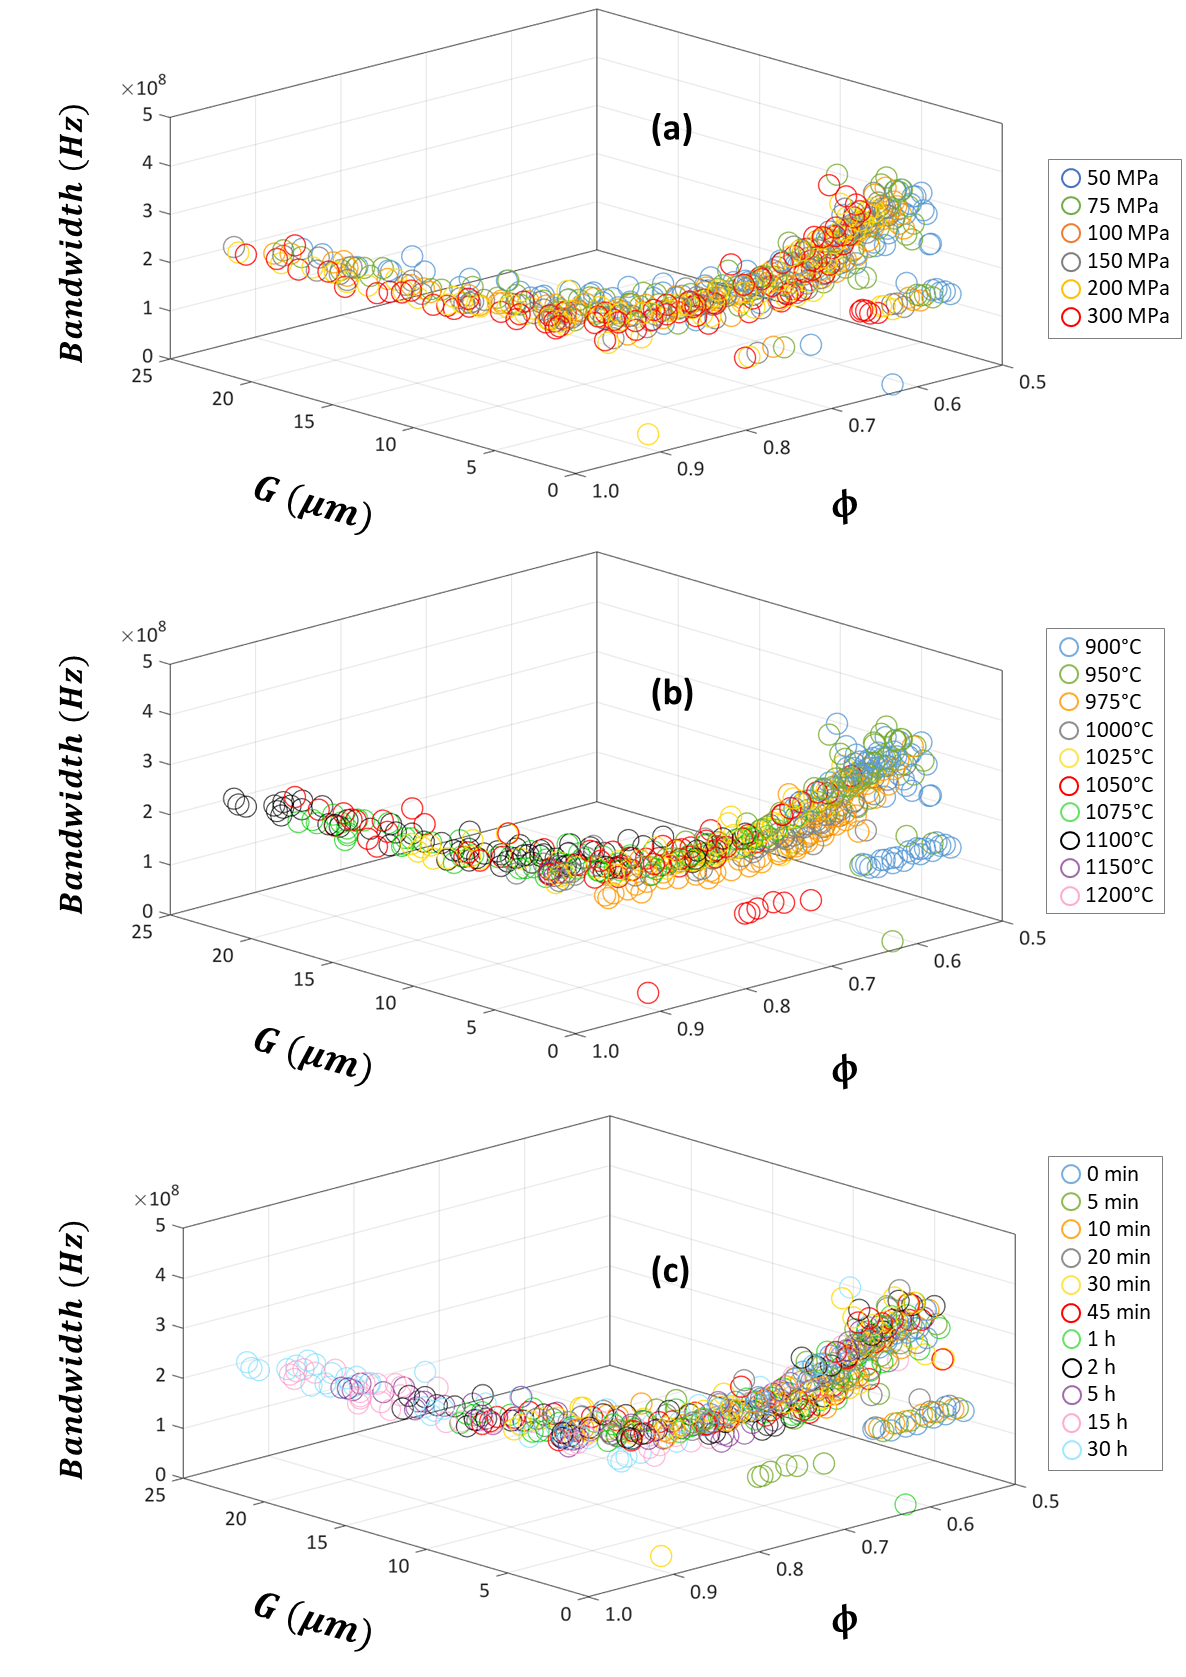


Supplementary Fig. 6. Sintered microstructure (relative density and average grain size ) dependence of bandwidth for of the sintered Cu-doped Ni-Zn-polycrystalline ferrite. Effect of pressing pressure (a), sintering temperature (b) and sintering time (c).


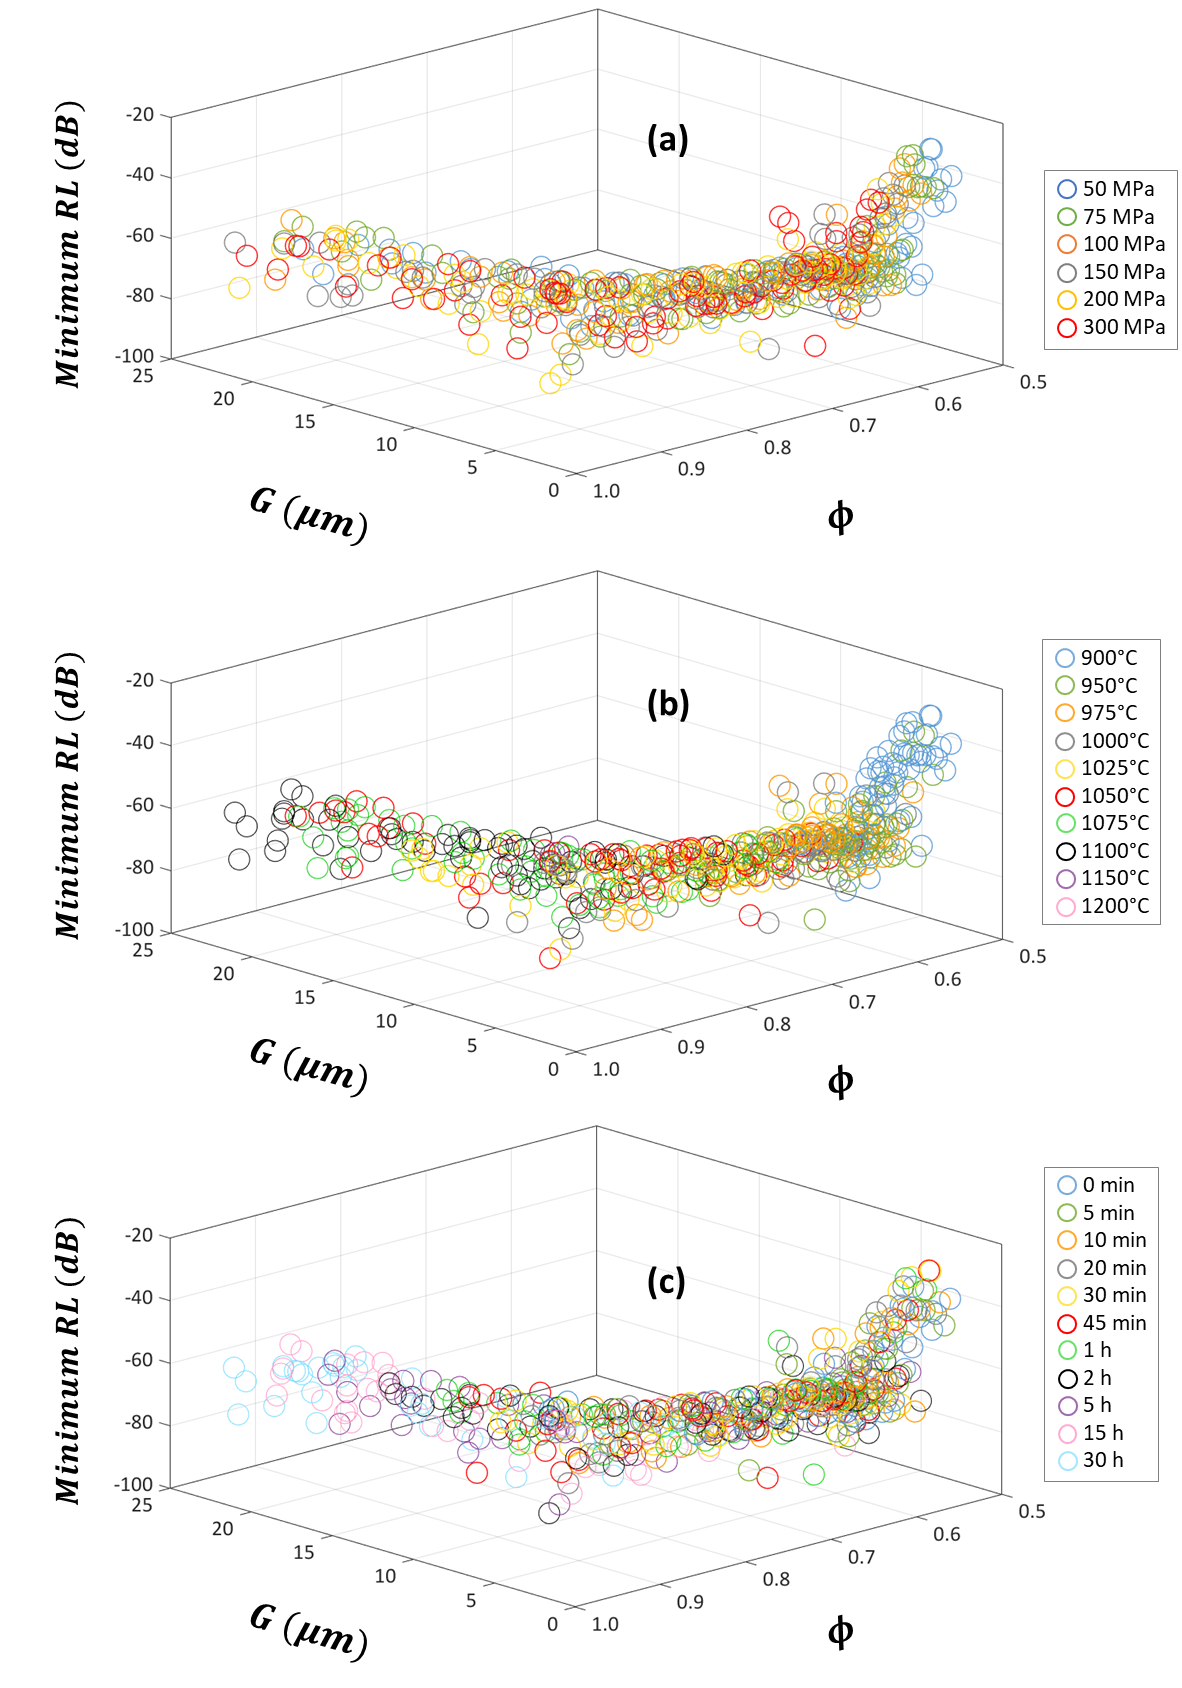


Supplementary Fig. 7. Sintered microstructure (relative density and average grain size ) dependence of minimum reflection-loss of the sintered Cu-doped Ni-Zn-polycrystalline ferrite. Effect of pressing pressure (a), sintering temperature (b) and sintering time (c).
